# Supplementary material
Source: PubMed Central journal article supplement (PMC4470573)
Supplement: NIHMS696723-supplement-Supplemenatry_I.pdf [file NIHMS696723-supplement-Supplemenatry_I.pdf]

## Supplementary I: theoretical results

The theoretical mean of  $T$  can be decomposed as  $\mu = E(L) + E(M) + E(R)$ . Because  $M$  is an indicator random variable,  $E(M) = \Pr(M = 1)$  and  $\text{Var}(M) = \Pr(M)[1 - \Pr(M)]$ . If we let  $X_k$  be the unordered genotype of SNP  $k$ , then it is natural to calculate  $E(L)$  as  $E[E(L | X_0)]$ . Since  $X_0$  takes only three possible values, the outer expectation in  $E[E(L | X_0)]$  is trivial to compute. The case  $X_0 = 1/2$  is easiest of all because  $L = 0$  when  $X_0 = 1/2$  and  $M = 0$ . Similar comments apply to  $E(R)$ . The most natural route to calculating the variance  $\sigma^2$  follows the formula

$$\text{Var}(T) = \text{Var}(L) + \text{Var}(M) + \text{Var}(R) + 2 \text{Cov}(L, M) + 2 \text{Cov}(L, R) + 2 \text{Cov}(M, R).$$

Again it is productive to condition on  $X_0$ . For instance,

$$\begin{aligned} \text{Var}(L) &= \text{Var}[E(L | X_0)] + E[\text{Var}(L | X_0)], \\ \text{Var}(R) &= \text{Var}[E(R | X_0)] + E[\text{Var}(R | X_0)], \end{aligned}$$

and, assuming  $L$  and  $R$  are independent given  $X_0$ ,

$$\text{Cov}(L, R) = \text{Cov}[E(L | X_0), E(R | X_0)] + E[\text{Cov}(L, R | X_0)] = \text{Cov}[E(L | X_0), E(R | X_0)].$$

It is also worth pointing out that  $E(LM) = E(L)$  and  $E(RM) = E(R)$ , since  $L$  and  $R$  equal 0 when  $M$  does, and when  $M = 1$ ,  $LM$  equals  $L$  and  $RM$  equals  $R$ . Thus, one has

$$\begin{aligned} \text{Cov}(L, M) &= E(LM) - E(L)E(M) = E(L)[1 - E(M)], \\ \text{Cov}(R, M) &= E(RM) - E(R)E(M) = E(R)[1 - E(M)]. \end{aligned}$$

These considerations emphasize the importance of finding the distributions of  $L$  and  $R$  conditional on  $X_0 = 1/1$  and  $X_0 = 2/2$ . The next few sections tackle this issue.

To compute the conditional means and variances of  $L$  and  $R$  numerically, we recommend the right-tail sums

$$E(Y) = \sum_{j=1}^{\infty} \Pr(Y \geq j), \quad E(Y^2) = \sum_{j=1}^{\infty} (2j - 1) \Pr(Y \geq j), \quad (1)$$

valid for any nonnegative random variable  $Y$  with integer values; see Section XI.1 of (Feller, 1968). The sums defining  $E(Y)$  and  $E(Y^2)$  can be truncated as soon as they stabilize.

If we define  $h_{i_0, \dots, i_r}$  to be the population frequency of the haplotype  $(i_0, \dots, i_r)$  extending from SNP 0 to SNP  $r$ , then the formula

$$\Pr(R \geq r \mid X_0 = i_0/i_0) = \frac{1}{p_{0,i_0}^2} \sum_{i_1=1}^2 \cdots \sum_{i_r=2}^2 h_{i_0, \dots, i_r}^2$$

delivers the required right-tail probabilities. Here  $p_{0,i_0}$  is the frequency of allele  $i_0$  of the core SNP 0. When all conceivable haplotypes are possible, there are  $2^r$  terms in the multiple sum, and the formula as it stands is cumbersome. On the other hand, if only a few haplotypes are possible, then the sum is straightforward to evaluate. The moment formulas (1) are still applicable. The haplotype frequencies  $h_{i_0, \dots, i_r}$  can be estimated from haplotype data.
