# Supplementary material
Source: PubMed Central journal article supplement (PMC4470573)
Supplement: NIHMS696723-supplement-Supplementary_III_-_part_II.pdf [file NIHMS696723-supplement-Supplementary_III_-_part_II.pdf]

Table 18: Regions and SNPs which had highest xp-EHHST values, strongest differentiations, and high derived allele frequency in the tested population CHB+JPT ( $> 0.5$ ) on chromosome 7 of the HapMap phase II data. \* marked regions which were not reported in Table 1, Sabeti et al. (2007). † marked regions which were not identified by EHHST in Zhong et al. (2010).

| Chromosome<br>Pop A vs Pop B                  | SNP<br>Name | Position  | Derived Allele Freq |        | $F_{st}$ |        | xp-EHHST |        |
|-----------------------------------------------|-------------|-----------|---------------------|--------|----------|--------|----------|--------|
|                                               |             |           | $p_A$               | $p_B$  | Value    | Pct    | Value    | Pct    |
| Chromosome 7 <sup>*,†</sup><br>CEU vs CHB+JPT | rs10270418  | 135458203 | 0.7333              | 0.9889 | 0.5460   | 0.9913 | -16.995  | 0.9934 |
|                                               | rs1386782   | 135458694 | 0.7417              | 0.9889 | 0.5488   | 0.9914 | -16.529  | 0.9929 |
|                                               | rs10251225  | 135465466 | 0.7583              | 0.9889 | 0.5383   | 0.9905 | -15.901  | 0.9920 |
|                                               | rs2129801   | 135465736 | 0.5333              | 0.8944 | 0.6324   | 0.9971 | -15.203  | 0.9910 |
|                                               | rs6467639   | 135468663 | 0.4333              | 0.8778 | 0.6268   | 0.9968 | -15.287  | 0.9911 |
|                                               | rs12534779  | 135472243 | 0.4333              | 0.8778 | 0.6268   | 0.9968 | -15.000  | 0.9906 |
|                                               | rs7792573   | 135481102 | 0.5833              | 0.8778 | 0.5350   | 0.9903 | -28.290  | 0.9986 |
|                                               | rs7809350   | 135481149 | 0.4417              | 0.8778 | 0.6257   | 0.9966 | -28.259  | 0.9986 |
|                                               | rs7457671   | 135484246 | 0.4500              | 0.8778 | 0.6247   | 0.9966 | -28.654  | 0.9986 |
|                                               | rs1973304   | 135486717 | 0.5833              | 0.8778 | 0.5350   | 0.9903 | -28.898  | 0.9987 |
|                                               | rs834767    | 135496001 | 0.5083              | 0.9389 | 0.6881   | 0.9991 | -30.028  | 0.9990 |
|                                               | rs834768    | 135496018 | 0.5083              | 0.9389 | 0.6881   | 0.9991 | -29.937  | 0.9990 |
| Chromosome 7 <sup>*,†</sup><br>CHB+JPT vs YRI | rs10270418  | 135458203 | 0.9889              | 0.2583 | 0.5460   | 0.9913 | 20.967   | 0.9947 |
|                                               | rs1386782   | 135458694 | 0.9889              | 0.2583 | 0.5488   | 0.9914 | 20.436   | 0.9940 |
|                                               | rs10251225  | 135465466 | 0.9889              | 0.2750 | 0.5383   | 0.9905 | 19.094   | 0.9916 |
|                                               | rs2129801   | 135465736 | 0.8944              | 0.0167 | 0.6324   | 0.9971 | 19.002   | 0.9915 |
|                                               | rs6467639   | 135468663 | 0.8778              | 0.0083 | 0.6268   | 0.9968 | 19.237   | 0.9920 |
|                                               | rs12534779  | 135472243 | 0.8778              | 0.0083 | 0.6268   | 0.9968 | 18.327   | 0.9902 |
|                                               | rs7792573   | 135481102 | 0.8778              | 0.0917 | 0.5350   | 0.9903 | 39.725   | 0.9997 |
|                                               | rs7809350   | 135481149 | 0.8778              | 0.0083 | 0.6257   | 0.9966 | 40.786   | 0.9998 |
|                                               | rs7457671   | 135484246 | 0.8778              | 0.0083 | 0.6247   | 0.9966 | 40.524   | 0.9997 |
|                                               | rs1973304   | 135486717 | 0.8778              | 0.0917 | 0.5350   | 0.9903 | 39.163   | 0.9996 |
|                                               | rs834767    | 135496001 | 0.9389              | 0.0167 | 0.6881   | 0.9991 | 33.618   | 0.9989 |
|                                               | rs834768    | 135496018 | 0.9389              | 0.0167 | 0.6881   | 0.9991 | 33.498   | 0.9989 |

Table 19: Regions and SNPs which had highest xp-EHHST values, strongest differentiations, and high derived allele frequency in the tested population CHB+JPT ( $> 0.5$ ) on chromosome 10 of the HapMap phase II data. In the first column, the **Genes** provided names and positions of genes which were located in a region.

| Chromosome<br>Pop A vs Pop B                                          | SNP<br>Name | Position | Derived Allele Freq |        | $F_{st}$ |        | xp-EHHST |        |
|-----------------------------------------------------------------------|-------------|----------|---------------------|--------|----------|--------|----------|--------|
|                                                                       |             |          | $p_A$               | $p_B$  | Value    | Pct    | Value    | Pct    |
| Chromosome 10<br>CEU vs CHB+JPT<br><i>PCDH15</i><br>(55,233-56,231kb) | rs10825242  | 55554795 | 0.2333              | 0.9167 | 0.5955   | 0.9951 | -55.203  | 0.9998 |
|                                                                       | rs12218327  | 55561007 | 0.2250              | 0.9000 | 0.6222   | 0.9970 | -51.682  | 0.9996 |
|                                                                       | rs9787578   | 55561682 | 0.3250              | 0.9444 | 0.5606   | 0.9925 | -51.074  | 0.9995 |
|                                                                       | rs9787465   | 55562067 | 0.2250              | 0.9056 | 0.5626   | 0.9927 | -50.919  | 0.9995 |
|                                                                       | rs4447073   | 55568150 | 0.3250              | 0.9444 | 0.5606   | 0.9925 | -49.152  | 0.9993 |
|                                                                       | rs11004104  | 55588365 | 0.2333              | 0.9444 | 0.6706   | 0.9987 | -43.319  | 0.9990 |
|                                                                       | rs11004105  | 55589349 | 0.2333              | 0.9444 | 0.6771   | 0.9989 | -41.583  | 0.9989 |
|                                                                       | rs4636568   | 55590392 | 0.2333              | 0.9444 | 0.6706   | 0.9987 | -40.441  | 0.9988 |
|                                                                       | rs11004106  | 55591311 | 0.2333              | 0.9444 | 0.6706   | 0.9987 | -39.625  | 0.9987 |
|                                                                       | rs11004107  | 55591322 | 0.2250              | 0.9167 | 0.6576   | 0.9984 | -37.670  | 0.9983 |
|                                                                       | rs10763079  | 55605400 | 0.6917              | 0.9889 | 0.5507   | 0.9914 | -34.752  | 0.9976 |
|                                                                       | rs6481064   | 55605939 | 0.6750              | 0.9889 | 0.6044   | 0.9958 | -31.452  | 0.9964 |
|                                                                       | rs12246601  | 55606314 | 0.6917              | 0.9889 | 0.5507   | 0.9914 | -31.325  | 0.9964 |
|                                                                       | rs11004121  | 55607489 | 0.6917              | 0.9889 | 0.5507   | 0.9914 | -31.027  | 0.9963 |
|                                                                       | rs10082369  | 55612400 | 0.6750              | 0.9889 | 0.6044   | 0.9958 | -28.284  | 0.9956 |
|                                                                       | rs7093302   | 55613190 | 0.3250              | 0.9278 | 0.6314   | 0.9975 | -27.219  | 0.9952 |
|                                                                       | rs10825264  | 55617960 | 0.1750              | 0.8944 | 0.5766   | 0.9940 | -21.409  | 0.9930 |
|                                                                       | rs4935502   | 55625450 | 0.1583              | 0.8944 | 0.6269   | 0.9973 | -37.673  | 0.9983 |
|                                                                       | rs10825275  | 55640296 | 0.9417              | 0.9944 | 0.6264   | 0.9973 | -54.494  | 0.9998 |
|                                                                       | rs7093540   | 55641050 | 0.3417              | 0.9000 | 0.5585   | 0.9922 | -51.461  | 0.9996 |
|                                                                       | rs11004141  | 55641433 | 0.1583              | 0.8667 | 0.6411   | 0.9978 | -54.120  | 0.9997 |
|                                                                       | rs4935104   | 55646474 | 0.1500              | 0.8556 | 0.5711   | 0.9934 | -53.917  | 0.9997 |
|                                                                       | rs1970519   | 55790948 | 0.2250              | 0.8667 | 0.6210   | 0.9969 | -37.115  | 0.9983 |
|                                                                       | rs2028440   | 55796208 | 0.2333              | 0.8722 | 0.6235   | 0.9970 | -40.584  | 0.9989 |
|                                                                       | rs11004267  | 55806859 | 0.2417              | 0.8667 | 0.6424   | 0.9979 | -33.323  | 0.9971 |
|                                                                       | rs11004270  | 55817364 | 0.2250              | 0.8667 | 0.6511   | 0.9982 | -33.381  | 0.9971 |
|                                                                       | rs11004275  | 55822846 | 0.2333              | 0.8667 | 0.6018   | 0.9956 | -33.037  | 0.9969 |
|                                                                       | rs10825320  | 55826240 | 0.8583              | 0.9722 | 0.5829   | 0.9944 | -32.494  | 0.9968 |
|                                                                       | rs2050998   | 55827170 | 0.8583              | 0.9722 | 0.5829   | 0.9944 | -32.383  | 0.9967 |
|                                                                       | rs2050999   | 55827214 | 0.2333              | 0.8667 | 0.6018   | 0.9956 | -31.867  | 0.9965 |
|                                                                       | rs9943342   | 55832701 | 0.2333              | 0.8667 | 0.6018   | 0.9956 | -31.326  | 0.9964 |
|                                                                       | rs2795918   | 55847021 | 0.3250              | 0.9222 | 0.6094   | 0.9962 | -28.038  | 0.9955 |
|                                                                       | rs1219862   | 55860311 | 0.3250              | 0.9222 | 0.6313   | 0.9975 | -34.377  | 0.9975 |

Table 20: Continuation of Table 19.

| Chromosome<br>Pop A vs Pop B                                          | SNP<br>Name | Position | Derived Allele Freq |        | $F_{st}$ |        | xp-EHHST |        |
|-----------------------------------------------------------------------|-------------|----------|---------------------|--------|----------|--------|----------|--------|
|                                                                       |             |          | $p_A$               | $p_B$  | Value    | Pct    | Value    | Pct    |
| Chromosome 10<br>CHB+JPT vs YRI<br><i>PCDH15</i><br>(55,233-56,231kb) | rs10825242  | 55554795 | 0.9167              | 0.1833 | 0.5955   | 0.9951 | 51.477   | 0.9987 |
|                                                                       | rs12218327  | 55561007 | 0.9000              | 0.1250 | 0.6222   | 0.9970 | 50.844   | 0.9986 |
|                                                                       | rs9787578   | 55561682 | 0.9444              | 0.2167 | 0.5606   | 0.9925 | 49.632   | 0.9984 |
|                                                                       | rs9787465   | 55562067 | 0.9056              | 0.2167 | 0.5626   | 0.9927 | 49.061   | 0.9984 |
|                                                                       | rs4447073   | 55568150 | 0.9444              | 0.2167 | 0.5606   | 0.9925 | 47.853   | 0.9982 |
|                                                                       | rs11004104  | 55588365 | 0.9444              | 0.1333 | 0.6706   | 0.9987 | 46.209   | 0.9979 |
|                                                                       | rs11004105  | 55589349 | 0.9444              | 0.1250 | 0.6771   | 0.9989 | 44.895   | 0.9976 |
|                                                                       | rs4636568   | 55590392 | 0.9444              | 0.1333 | 0.6706   | 0.9987 | 43.492   | 0.9974 |
|                                                                       | rs11004106  | 55591311 | 0.9444              | 0.1333 | 0.6706   | 0.9987 | 42.900   | 0.9973 |
|                                                                       | rs11004107  | 55591322 | 0.9167              | 0.1083 | 0.6576   | 0.9984 | 40.942   | 0.9969 |
|                                                                       | rs10763079  | 55605400 | 0.9889              | 0.2417 | 0.5507   | 0.9914 | 37.505   | 0.9963 |
|                                                                       | rs6481064   | 55605939 | 0.9889              | 0.1833 | 0.6044   | 0.9958 | 34.478   | 0.9956 |
|                                                                       | rs12246601  | 55606314 | 0.9889              | 0.2417 | 0.5507   | 0.9914 | 34.235   | 0.9955 |
|                                                                       | rs11004121  | 55607489 | 0.9889              | 0.2417 | 0.5507   | 0.9914 | 33.948   | 0.9954 |
|                                                                       | rs10082369  | 55612400 | 0.9889              | 0.1833 | 0.6044   | 0.9958 | 34.434   | 0.9956 |
|                                                                       | rs7093302   | 55613190 | 0.9278              | 0.1000 | 0.6314   | 0.9975 | 33.508   | 0.9952 |
|                                                                       | rs10825264  | 55617960 | 0.8944              | 0.2250 | 0.5766   | 0.9940 | 28.374   | 0.9903 |
|                                                                       | rs4935502   | 55625450 | 0.8944              | 0.1667 | 0.6269   | 0.9973 | 55.269   | 0.9990 |
|                                                                       | rs10825275  | 55640296 | 0.9944              | 0.3167 | 0.6264   | 0.9973 | 77.686   | 0.9998 |
|                                                                       | rs7093540   | 55641050 | 0.9000              | 0.1333 | 0.5585   | 0.9922 | 99.095   | 1.0000 |
|                                                                       | rs11004141  | 55641433 | 0.8667              | 0.1000 | 0.6411   | 0.9978 | 98.920   | 1.0000 |
|                                                                       | rs4935104   | 55646474 | 0.8556              | 0.1833 | 0.5711   | 0.9934 | 83.989   | 0.9999 |
|                                                                       | rs1970519   | 55790948 | 0.8667              | 0.0750 | 0.6210   | 0.9969 | 47.918   | 0.9982 |
|                                                                       | rs2028440   | 55796208 | 0.8722              | 0.0750 | 0.6235   | 0.9970 | 48.181   | 0.9982 |
|                                                                       | rs11004267  | 55806859 | 0.8667              | 0.0417 | 0.6424   | 0.9979 | 41.620   | 0.9971 |
|                                                                       | rs11004270  | 55817364 | 0.8667              | 0.0417 | 0.6511   | 0.9982 | 45.689   | 0.9977 |
|                                                                       | rs11004275  | 55822846 | 0.8667              | 0.0917 | 0.6018   | 0.9956 | 43.371   | 0.9974 |
|                                                                       | rs10825320  | 55826240 | 0.9722              | 0.2583 | 0.5829   | 0.9944 | 42.476   | 0.9973 |
|                                                                       | rs2050998   | 55827170 | 0.9722              | 0.2583 | 0.5829   | 0.9944 | 42.353   | 0.9972 |
|                                                                       | rs2050999   | 55827214 | 0.8667              | 0.0917 | 0.6018   | 0.9956 | 42.422   | 0.9972 |
|                                                                       | rs9943342   | 55832701 | 0.8667              | 0.0917 | 0.6018   | 0.9956 | 41.187   | 0.9970 |
|                                                                       | rs2795918   | 55847021 | 0.9222              | 0.1167 | 0.6094   | 0.9962 | 42.389   | 0.9972 |
|                                                                       | rs1219862   | 55860311 | 0.9222              | 0.0917 | 0.6313   | 0.9975 | 50.331   | 0.9986 |

Table 21: Regions and SNPs which had highest xp-EHHST values, strongest differentiations, and high derived allele frequency in the tested population CEU ( $> 0.5$ ) on chromosome 12 of the HapMap phase II data. \* marked regions which were not reported in Table 1, Sabeti et al. (2007). † marked regions which were not identified by EHHST in Zhong et al. (2010).

| Chromosome<br>Pop A vs Pop B       | SNP<br>Name | Position | Derived Allele Freq |        | $F_{st}$ |        | xp-EHHST |        |
|------------------------------------|-------------|----------|---------------------|--------|----------|--------|----------|--------|
|                                    |             |          | $p_A$               | $p_B$  | Value    | Pct    | Value    | Pct    |
| Chromosome 12*,†<br>CEU vs CHB+JPT | rs1502631   | 37243569 | 0.9667              | 0.5111 | 0.5578   | 0.9928 | 12.800   | 0.9959 |
|                                    | rs10875817  | 37243759 | 0.8917              | 0.2722 | 0.5631   | 0.9933 | 12.859   | 0.9960 |
|                                    | rs2730918   | 37246733 | 0.9833              | 0.5111 | 0.5754   | 0.9944 | 12.981   | 0.9962 |
|                                    | rs2221304   | 37254059 | 0.9583              | 0.5111 | 0.5409   | 0.9915 | 12.583   | 0.9955 |
|                                    | rs10875855  | 37261237 | 0.8833              | 0.2722 | 0.5540   | 0.9926 | 12.549   | 0.9955 |
|                                    | rs10875857  | 37261549 | 0.8833              | 0.2722 | 0.5540   | 0.9926 | 12.511   | 0.9954 |
|                                    | rs2730891   | 37270952 | 0.9583              | 0.5111 | 0.5491   | 0.9923 | 11.418   | 0.9929 |
|                                    | rs10459231  | 37280733 | 0.8833              | 0.2722 | 0.5390   | 0.9913 | 12.347   | 0.9949 |
|                                    | rs6580697   | 37304842 | 0.8833              | 0.2722 | 0.5540   | 0.9926 | 16.983   | 0.9987 |
|                                    | rs12368548  | 37305823 | 0.8833              | 0.2722 | 0.5540   | 0.9926 | 15.457   | 0.9985 |
|                                    | rs2047781   | 37310803 | 0.8833              | 0.2722 | 0.5317   | 0.9905 | 15.397   | 0.9985 |
|                                    | rs1472655   | 37323405 | 0.8833              | 0.2667 | 0.5424   | 0.9916 | 14.590   | 0.9982 |
|                                    | rs1472656   | 37323559 | 0.8833              | 0.2667 | 0.5574   | 0.9928 | 14.561   | 0.9982 |
|                                    | rs995456    | 37323680 | 0.8833              | 0.2611 | 0.5459   | 0.9920 | 14.563   | 0.9982 |
|                                    | rs1472658   | 37325343 | 0.8833              | 0.2667 | 0.5574   | 0.9928 | 14.220   | 0.9981 |
|                                    | rs10875944  | 37326519 | 0.8750              | 0.2667 | 0.5484   | 0.9922 | 14.070   | 0.9980 |
|                                    | rs10875945  | 37326540 | 0.8750              | 0.2667 | 0.5484   | 0.9922 | 14.033   | 0.9979 |
|                                    | rs1486341   | 37328330 | 0.8750              | 0.2667 | 0.5966   | 0.9958 | 13.096   | 0.9965 |
|                                    | rs10875950  | 37329512 | 0.8833              | 0.2667 | 0.6054   | 0.9963 | 12.977   | 0.9962 |
|                                    | rs11168978  | 37330628 | 0.8750              | 0.2667 | 0.5800   | 0.9949 | 12.895   | 0.9961 |
| rs10875951                         | 37330813    | 0.8750   | 0.2722              | 0.5768 | 0.9946   | 12.798 | 0.9959   |        |
| rs2062758                          | 37331719    | 0.8750   | 0.2667              | 0.5883 | 0.9954   | 12.809 | 0.9959   |        |
| rs1564978                          | 37336502    | 0.8750   | 0.2667              | 0.5800 | 0.9949   | 11.032 | 0.9918   |        |
| Chromosome 12*,†<br>CEU vs YRI     | rs1502631   | 37243569 | 0.9667              | 0.0750 | 0.5578   | 0.9928 | 15.711   | 0.9945 |
|                                    | rs10875817  | 37243759 | 0.8917              | 0.0583 | 0.5631   | 0.9933 | 15.468   | 0.9940 |
|                                    | rs2730918   | 37246733 | 0.9833              | 0.0750 | 0.5754   | 0.9944 | 16.242   | 0.9955 |
|                                    | rs2221304   | 37254059 | 0.9583              | 0.0833 | 0.5409   | 0.9915 | 15.330   | 0.9937 |
|                                    | rs10875855  | 37261237 | 0.8833              | 0.0583 | 0.5540   | 0.9926 | 14.992   | 0.9929 |
|                                    | rs10875857  | 37261549 | 0.8833              | 0.0583 | 0.5540   | 0.9926 | 14.958   | 0.9928 |
|                                    | rs6580697   | 37304842 | 0.8833              | 0.0583 | 0.5540   | 0.9926 | 19.047   | 0.9983 |
|                                    | rs12368548  | 37305823 | 0.8833              | 0.0583 | 0.5540   | 0.9926 | 16.378   | 0.9956 |
|                                    | rs2047781   | 37310803 | 0.8833              | 0.0833 | 0.5317   | 0.9905 | 16.270   | 0.9955 |
|                                    | rs1472655   | 37323405 | 0.8833              | 0.0750 | 0.5424   | 0.9916 | 14.398   | 0.9907 |
|                                    | rs1472656   | 37323559 | 0.8833              | 0.0583 | 0.5574   | 0.9928 | 14.385   | 0.9907 |
|                                    | rs995456    | 37323680 | 0.8833              | 0.0750 | 0.5459   | 0.9920 | 14.336   | 0.9904 |
|                                    | rs1472658   | 37325343 | 0.8833              | 0.0583 | 0.5574   | 0.9928 | 14.719   | 0.9920 |
|                                    | rs10875944  | 37326519 | 0.8750              | 0.0583 | 0.5484   | 0.9922 | 14.701   | 0.9920 |
|                                    | rs10875945  | 37326540 | 0.8750              | 0.0583 | 0.5484   | 0.9922 | 14.661   | 0.9918 |
|                                    | rs1486341   | 37328330 | 0.8750              | 0.0083 | 0.5966   | 0.9958 | 14.470   | 0.9911 |

Table 22: Regions and SNPs which had highest xp-EHHST values, strongest differentiations, and high derived allele frequency in the tested population CHB+JPT ( $> 0.5$ ) on chromosome 15 of the HapMap phase II data.

| Chromosome<br>Pop A vs Pop B    | SNP<br>Name | Position | Deriv Allele Freq |        | $F_{st}$ |        | xp-EHHST |        |
|---------------------------------|-------------|----------|-------------------|--------|----------|--------|----------|--------|
|                                 |             |          | $p_A$             | $p_B$  | Value    | Pct    | Value    | Pct    |
| Chromosome 15<br>CEU vs CHB+JPT | rs11635593  | 61799912 | 0.1167            | 0.9167 | 0.6708   | 0.9967 | -19.276  | 0.9965 |
|                                 | rs7163401   | 61811844 | 0.0583            | 0.9167 | 0.7184   | 0.9984 | -19.273  | 0.9965 |
|                                 | rs7172848   | 61818807 | 0.0583            | 0.9167 | 0.7184   | 0.9984 | -19.697  | 0.9967 |
|                                 | rs7164301   | 61821430 | 0.0583            | 0.9167 | 0.7184   | 0.9984 | -19.562  | 0.9967 |
|                                 | rs8037083   | 61853580 | 0.0583            | 0.9167 | 0.6868   | 0.9972 | -19.908  | 0.9969 |
|                                 | rs2414823   | 61860806 | 0.0583            | 0.9167 | 0.7184   | 0.9984 | -19.087  | 0.9964 |
|                                 | rs7178111   | 61862564 | 0.1000            | 0.9167 | 0.6891   | 0.9972 | -19.847  | 0.9969 |
|                                 | rs6494433   | 61869963 | 0.0583            | 0.9167 | 0.7184   | 0.9984 | -18.323  | 0.9958 |
|                                 | rs4984317   | 61871710 | 0.0583            | 0.9167 | 0.7184   | 0.9984 | -17.426  | 0.9950 |
|                                 | rs4984318   | 61871736 | 0.0583            | 0.9167 | 0.7184   | 0.9984 | -17.276  | 0.9949 |
|                                 | rs8027701   | 61878102 | 0.0667            | 0.9167 | 0.7114   | 0.9979 | -17.142  | 0.9948 |
|                                 | rs6494436   | 61878357 | 0.0583            | 0.9167 | 0.7136   | 0.9980 | -16.399  | 0.9936 |
|                                 | rs4776681   | 61886816 | 0.0583            | 0.9167 | 0.7184   | 0.9984 | -15.795  | 0.9925 |
|                                 | rs7173437   | 61887845 | 0.0583            | 0.8833 | 0.6760   | 0.9968 | -15.543  | 0.9919 |
|                                 | rs2099921   | 61890902 | 0.0583            | 0.8833 | 0.6760   | 0.9968 | -15.416  | 0.9918 |
|                                 | rs7178104   | 61892636 | 0.0583            | 0.8889 | 0.6830   | 0.9971 | -14.933  | 0.9912 |
|                                 | rs7182375   | 61892683 | 0.0583            | 0.8889 | 0.6153   | 0.9942 | -14.766  | 0.9910 |
|                                 | rs978363    | 61936745 | 0.2667            | 0.9222 | 0.6224   | 0.9946 | -14.323  | 0.9902 |

Table 23: Continuation of Table 22.

| Chromosome<br>Pop A vs Pop B    | SNP<br>Name | Position | Deriv Allele Freq |        | $F_{st}$ |        | xp-EHHST |        |
|---------------------------------|-------------|----------|-------------------|--------|----------|--------|----------|--------|
|                                 |             |          | $p_A$             | $p_B$  | Value    | Pct    | Value    | Pct    |
| Chromosome 15<br>CHB+JPT vs YRI | rs10152404  | 61751519 | 0.9167            | 0.2083 | 0.7234   | 0.9985 | 17.828   | 0.9931 |
|                                 | rs7166366   | 61751621 | 0.9167            | 0.1833 | 0.7377   | 0.9991 | 17.797   | 0.9930 |
|                                 | rs6494424   | 61752492 | 0.9167            | 0.1833 | 0.7377   | 0.9991 | 17.718   | 0.9929 |
|                                 | rs6494425   | 61752758 | 0.9167            | 0.1833 | 0.7377   | 0.9991 | 17.637   | 0.9927 |
|                                 | rs7166206   | 61767213 | 0.9167            | 0.1833 | 0.7377   | 0.9991 | 17.386   | 0.9924 |
|                                 | rs6494428   | 61778778 | 0.9167            | 0.1833 | 0.7377   | 0.9991 | 16.923   | 0.9910 |
|                                 | rs4411464   | 61782476 | 0.9167            | 0.1833 | 0.7234   | 0.9985 | 17.304   | 0.9921 |
|                                 | rs16947373  | 61785368 | 0.9167            | 0.1917 | 0.7184   | 0.9984 | 17.141   | 0.9916 |
|                                 | rs11635593  | 61799912 | 0.9167            | 0.1917 | 0.6708   | 0.9967 | 36.756   | 0.9998 |
|                                 | rs7163401   | 61811844 | 0.9167            | 0.1917 | 0.7184   | 0.9984 | 37.317   | 0.9999 |
|                                 | rs7172848   | 61818807 | 0.9167            | 0.1917 | 0.7184   | 0.9984 | 37.745   | 1.0000 |
|                                 | rs7164301   | 61821430 | 0.9167            | 0.1917 | 0.7184   | 0.9984 | 37.472   | 0.9999 |
|                                 | rs8037083   | 61853580 | 0.9167            | 0.2500 | 0.6868   | 0.9972 | 30.201   | 0.9990 |
|                                 | rs2414823   | 61860806 | 0.9167            | 0.1917 | 0.7184   | 0.9984 | 29.815   | 0.9989 |
|                                 | rs7178111   | 61862564 | 0.9167            | 0.1833 | 0.6891   | 0.9972 | 29.638   | 0.9989 |
|                                 | rs6494433   | 61869963 | 0.9167            | 0.1917 | 0.7184   | 0.9984 | 29.360   | 0.9988 |
|                                 | rs4984317   | 61871710 | 0.9167            | 0.1917 | 0.7184   | 0.9984 | 28.897   | 0.9988 |
|                                 | rs4984318   | 61871736 | 0.9167            | 0.1917 | 0.7184   | 0.9984 | 28.668   | 0.9988 |
|                                 | rs8027701   | 61878102 | 0.9167            | 0.1917 | 0.7114   | 0.9979 | 27.673   | 0.9987 |
|                                 | rs6494436   | 61878357 | 0.9167            | 0.2000 | 0.7136   | 0.9980 | 27.413   | 0.9987 |
|                                 | rs4776681   | 61886816 | 0.9167            | 0.1917 | 0.7184   | 0.9984 | 25.738   | 0.9983 |
|                                 | rs7173437   | 61887845 | 0.8833            | 0.1917 | 0.6760   | 0.9968 | 25.330   | 0.9981 |
|                                 | rs2099921   | 61890902 | 0.8833            | 0.1917 | 0.6760   | 0.9968 | 25.046   | 0.9979 |
|                                 | rs7178104   | 61892636 | 0.8889            | 0.1917 | 0.6830   | 0.9971 | 24.082   | 0.9974 |
|                                 | rs7182375   | 61892683 | 0.8889            | 0.3333 | 0.6153   | 0.9942 | 23.673   | 0.9972 |
|                                 | rs7165577   | 61904056 | 0.8889            | 0.1833 | 0.6880   | 0.9972 | 24.450   | 0.9976 |
|                                 | rs2053593   | 61905916 | 0.8889            | 0.1917 | 0.6830   | 0.9971 | 23.813   | 0.9973 |
|                                 | rs8042418   | 61911938 | 0.9167            | 0.1917 | 0.7184   | 0.9984 | 23.338   | 0.9971 |
|                                 | rs978363    | 61936745 | 0.9222            | 0.1333 | 0.6224   | 0.9946 | 19.676   | 0.9948 |
|                                 | rs978362    | 61936887 | 0.9222            | 0.1333 | 0.6224   | 0.9946 | 19.454   | 0.9946 |
|                                 | rs7180823   | 61937922 | 0.9222            | 0.1333 | 0.6501   | 0.9960 | 19.082   | 0.9942 |
|                                 | rs2053594   | 61938397 | 0.9222            | 0.1333 | 0.6501   | 0.9960 | 18.866   | 0.9940 |
