# Supplementary material
Source: PubMed Central journal article supplement (PMC4470573)
Supplement: NIHMS696723-supplement-Supplementary_III_-part_I.pdf [file NIHMS696723-supplement-Supplementary_III_-part_I.pdf]

## Supplementary III: candidate regions & SNPs of HapMap phase II data

In this supplementary, we presented 15 candidate regions and related SNPs in Tables 1 — 23 for natural selection. To select a candidate SNP, we used four selection criteria as follows: 1) the selected SNP had high absolute xp-EHHST value of top one percentile, i.e., the absolute xp-EHHST value of the SNP was in the top one percentile of all SNPs of a chromosome in which the SNP was located, 2) the selected SNP had an allele which was likely to be newly derived by using the data from <http://hg-wen.uchicago.edu/selection/frontpage.html> of the University of Chicago (Voight et al. 2006), 3) the derived allele of the selected SNP had a high frequency which was larger than 0.5 in the tested population, 4) the derived allele of the selected SNP was likely to be highly differentiated among the three populations of CHB+JPT, CEU, and YRI, in terms of the  $F_{st}$  score of the SNP was in the top one percentile of all  $F_{st}$  scores of SNPs on a chromosome. A candidate region was selected if there was a long list of SNPs which satisfied the selection criteria.

In the 15 candidate regions, 2 are close to regions (chromosome 1, 167,445,196—167,764,984bp; chromosome 4, 41,521,093 – 41,849,931bp) reported in Sabeti et al. (2007); and 9 were not reported in Sabeti et al. (2007); we counted these 11 regions as new candidates. In the 11 new candidate regions, 2 were not reported in Zhong et al. (2010), i.e., chromosome 7, 135,458,203 – 135,496,018bp and chromosome 12, 37,243,569 – 37,336,502bp. The remaining 4 regions were overlapped with the regions or were within regions reported in Sabeti et al. (2007).

## References

Voight BF, Kudaravalli S, Wen X, Pritchard JK. (2006) A map of recent positive selection in the human genome. *PLoS Biol* 4:e72.

Table 1: Regions and SNPs which had highest xp-EHHST values, strongest differentiations, and high derived allele frequency in the tested population CHB+JPT ( $> 0.5$ ) on chromosome 1 of the HapMap phase II data. \* marked regions which were not reported in Table 1, Sabeti et al. (2007). **Abbreviations:** Derv — Derived, Freq — Frequency, Pop — Population, Pct — percentile. In the first column, the **Genes** provided names and positions of genes which were located in a region.

| Chromosome<br>Pop A vs Pop B                                                                                | SNP<br>Name | Position | Derv Allele Freq |        | $F_{st}$ |         | xp-EHHST |        |
|-------------------------------------------------------------------------------------------------------------|-------------|----------|------------------|--------|----------|---------|----------|--------|
|                                                                                                             |             |          | $p_A$            | $p_B$  | Value    | Pct     | Value    | Pct    |
| Chromosome 1*<br>CEU vs CHB+JPT<br><i>LHX8</i><br>(75,367-75,400kb),<br><i>SLC44A5</i><br>(75,440-75,849kb) | rs11162498  | 75329244 | 0.2167           | 0.8278 | 0.541    | 0.9925  | -50.605  | 0.9995 |
|                                                                                                             | rs11162513  | 75339512 | 0.2167           | 0.8333 | 0.548    | 0.9931  | -54.908  | 0.9995 |
|                                                                                                             | rs6671729   | 75342043 | 0.2167           | 0.8278 | 0.541    | 0.9925  | -55.856  | 0.9995 |
|                                                                                                             | rs12402007  | 75343282 | 0.2000           | 0.8333 | 0.5582   | 0.9940  | -58.253  | 0.9996 |
|                                                                                                             | rs1007512   | 75344267 | 0.2250           | 0.8333 | 0.5431   | 0.9927  | -58.438  | 0.9996 |
|                                                                                                             | rs17096272  | 75355512 | 0.2167           | 0.8333 | 0.548    | 0.9931  | -63.317  | 0.9997 |
|                                                                                                             | rs6663002   | 75360138 | 0.2167           | 0.8333 | 0.548    | 0.9931  | -63.151  | 0.9997 |
|                                                                                                             | rs10493552  | 75364816 | 0.2000           | 0.8333 | 0.5582   | 0.9940  | -65.496  | 0.9998 |
|                                                                                                             | rs1526505   | 75371488 | 0.1917           | 0.8333 | 0.5635   | 0.9944  | -65.082  | 0.9998 |
|                                                                                                             | rs12041465  | 75381637 | 0.1833           | 0.8333 | 0.5689   | 0.9947  | -63.927  | 0.9997 |
| rs1144297                                                                                                   | 75512920    | 0.3750   | 0.8889           | 0.578  | 0.9953   | -29.518 | 0.9970   |        |
| Chromosome 1*<br>CHB+JPT vs YRI<br><i>LHX8</i><br>(75,367-75,400kb),<br><i>SLC44A5</i><br>(75,440-75,849kb) | rs11162498  | 75329244 | 0.8278           | 0.1167 | 0.5410   | 0.9925  | 35.56    | 0.9966 |
|                                                                                                             | rs11162513  | 75339512 | 0.8333           | 0.1167 | 0.5480   | 0.9931  | 62.533   | 0.9990 |
|                                                                                                             | rs6671729   | 75342043 | 0.8278           | 0.1167 | 0.5410   | 0.9925  | 63.013   | 0.9990 |
|                                                                                                             | rs12402007  | 75343282 | 0.8333           | 0.1167 | 0.5582   | 0.9940  | 64.195   | 0.9991 |
|                                                                                                             | rs1007512   | 75344267 | 0.8333           | 0.1167 | 0.5431   | 0.9927  | 64.084   | 0.9991 |
|                                                                                                             | rs17096272  | 75355512 | 0.8333           | 0.1167 | 0.5480   | 0.9931  | 68.183   | 0.9993 |
|                                                                                                             | rs6663002   | 75360138 | 0.8333           | 0.1167 | 0.5480   | 0.9931  | 66.911   | 0.9992 |
|                                                                                                             | rs10493552  | 75364816 | 0.8333           | 0.1167 | 0.5582   | 0.9940  | 67.754   | 0.9992 |
|                                                                                                             | rs1526505   | 75371488 | 0.8333           | 0.1167 | 0.5635   | 0.9944  | 76.491   | 0.9994 |
|                                                                                                             | rs12041465  | 75381637 | 0.8333           | 0.1167 | 0.5689   | 0.9947  | 75.436   | 0.9994 |
| rs1144297                                                                                                   | 75512920    | 0.8889   | 0.0833           | 0.5780 | 0.9953   | 49.291  | 0.9980   |        |

Table 2: Regions and SNPs which had highest xp-EHHST values, strongest differentiations, and high derived allele frequency in the tested population CHB+JPT ( $> 0.5$ ) on chromosome 1 of the HapMap phase II data. # marked regions which are close to candidate regions reported in Table 1, Sabeti et al. (2007). **Abbreviations:** Derv — Derived, Freq — Frequency, Pop — Population, Pct — percentile. In the first column, the **Genes** provided names and positions of genes which were located in a region.

| Chromosome<br>Pop A vs Pop B                                                                                     | SNP<br>Name | Position  | Derv Allele Freq |        | $F_{st}$ |         | xp-EHHST |        |
|------------------------------------------------------------------------------------------------------------------|-------------|-----------|------------------|--------|----------|---------|----------|--------|
|                                                                                                                  |             |           | $p_A$            | $p_B$  | Value    | Pct     | Value    | Pct    |
| Chromosome 1#<br>CEU vs CHB+JPT<br><i>BLZF1</i><br>(167,604-167,632kb),<br><i>SLC19A2</i><br>(167,700-167,722kb) | rs16828165  | 167445196 | 0.0083           | 0.6944 | 0.6295   | 0.9977  | -17.485  | 0.9903 |
|                                                                                                                  | rs12748624  | 167456395 | 0.0083           | 0.6944 | 0.6295   | 0.9977  | -17.486  | 0.9903 |
|                                                                                                                  | rs12751379  | 167502563 | 0.0083           | 0.7778 | 0.7206   | 0.9994  | -20.753  | 0.9933 |
|                                                                                                                  | rs16862081  | 167541896 | 0.0083           | 0.6944 | 0.6295   | 0.9977  | -18.539  | 0.9918 |
|                                                                                                                  | rs2066001   | 167550750 | 0.0083           | 0.6944 | 0.6460   | 0.9982  | -20.729  | 0.9932 |
|                                                                                                                  | rs3213587   | 167560450 | 0.0083           | 0.6944 | 0.6295   | 0.9977  | -20.197  | 0.993  |
|                                                                                                                  | rs3213586   | 167560464 | 0.0083           | 0.6944 | 0.6295   | 0.9977  | -20.027  | 0.9929 |
|                                                                                                                  | rs4140538   | 167561402 | 0.0083           | 0.6944 | 0.6295   | 0.9977  | -19.854  | 0.9928 |
|                                                                                                                  | rs12733001  | 167561423 | 0.0083           | 0.6944 | 0.6460   | 0.9982  | -19.680  | 0.9927 |
|                                                                                                                  | rs4140539   | 167561618 | 0.0083           | 0.6889 | 0.6235   | 0.9975  | -19.418  | 0.9925 |
|                                                                                                                  | rs3862937   | 167703302 | 0.0083           | 0.7000 | 0.6197   | 0.9973  | -21.877  | 0.9939 |
|                                                                                                                  | rs1883167   | 167703454 | 0.0083           | 0.7000 | 0.6197   | 0.9974  | -22.026  | 0.9939 |
|                                                                                                                  | rs16862217  | 167718808 | 0.0083           | 0.7056 | 0.6579   | 0.9985  | -23.474  | 0.9946 |
|                                                                                                                  | rs12022009  | 167735342 | 0.0083           | 0.7111 | 0.5291   | 0.9912  | -19.500  | 0.9925 |
|                                                                                                                  | rs9332658   | 167756570 | 0.0083           | 0.7000 | 0.6121   | 0.9970  | -24.169  | 0.9949 |
| rs9332623                                                                                                        | 167764984   | 0.0083    | 0.7000           | 0.6121 | 0.9970   | -25.392 | 0.9954   |        |
| Chromosome 1#<br>CHB+JPT vs YRI<br><i>BLZF1</i><br>(167,604-167,632kb),<br><i>SLC19A2</i><br>(167,700-167,722kb) | rs1080268   | 167443021 | 0.6944           | 0.0083 | 0.6460   | 0.9982  | 27.922   | 0.9924 |
|                                                                                                                  | rs1080267   | 167443093 | 0.8167           | 0.1000 | 0.6791   | 0.9989  | 28.024   | 0.9925 |
|                                                                                                                  | rs3753299   | 167443643 | 0.6889           | 0.0250 | 0.6235   | 0.9975  | 28.448   | 0.9929 |
|                                                                                                                  | rs16828165  | 167445196 | 0.6944           | 0.0250 | 0.6295   | 0.9977  | 29.401   | 0.9936 |
|                                                                                                                  | rs12748624  | 167456395 | 0.6944           | 0.0250 | 0.6295   | 0.9977  | 29.161   | 0.9934 |
|                                                                                                                  | rs12751379  | 167502563 | 0.7778           | 0.0250 | 0.7206   | 0.9994  | 28.226   | 0.9927 |
|                                                                                                                  | rs16862217  | 167718808 | 0.7056           | 0.0083 | 0.6579   | 0.9985  | 26.759   | 0.9915 |
|                                                                                                                  | rs9332658   | 167756570 | 0.7000           | 0.0500 | 0.6121   | 0.9970  | 27.852   | 0.9924 |
|                                                                                                                  | rs9332623   | 167764984 | 0.7000           | 0.0500 | 0.6121   | 0.9970  | 29.930   | 0.9940 |

Table 3: Regions and SNPs which had highest xp-EHHST values, strongest differentiations, and high derived allele frequency in the tested population CHB+JPT ( $> 0.5$ ) on chromosome 2 of the HapMap phase II data. **Abbreviations:** Freq — Frequency, Pop — Population, Pct — percentile.

| Chromosome<br>Pop A vs Pop B   | SNP<br>Name | Position | Derived Allele Freq |        | $F_{st}$ |        | xp-EHHST |        |
|--------------------------------|-------------|----------|---------------------|--------|----------|--------|----------|--------|
|                                |             |          | $p_A$               | $p_B$  | Value    | Pct    | Value    | Pct    |
| Chromosome 2<br>CEU vs CHB+JPT | rs9309464   | 72387471 | 0.7917              | 0.9944 | 0.8361   | 1.0000 | -97.218  | 0.9990 |
|                                | rs7595180   | 72389198 | 0.7833              | 0.9944 | 0.8320   | 1.0000 | -96.110  | 0.9989 |
|                                | rs6752122   | 72399186 | 0.7917              | 0.9944 | 0.8274   | 1.0000 | -89.603  | 0.9987 |
|                                | rs7558919   | 72402403 | 0.7917              | 0.9944 | 0.7671   | 0.9997 | -84.087  | 0.9986 |
|                                | rs6546764   | 72406443 | 0.7917              | 0.9944 | 0.7757   | 0.9997 | -82.873  | 0.9986 |
|                                | rs11126366  | 72407800 | 0.7917              | 0.9944 | 0.6810   | 0.9987 | -80.245  | 0.9985 |
|                                | rs2420444   | 72419965 | 0.7917              | 0.9944 | 0.8361   | 1.0000 | -73.076  | 0.9979 |
|                                | rs7594350   | 72425722 | 0.7917              | 0.9944 | 0.8361   | 1.0000 | -70.967  | 0.9977 |
|                                | rs7558686   | 72432297 | 0.7917              | 0.9944 | 0.7757   | 0.9997 | -60.153  | 0.9962 |
|                                | rs13390754  | 72437629 | 0.7917              | 0.9944 | 0.7671   | 0.9997 | -57.495  | 0.9957 |
|                                | rs598496    | 72438429 | 0.7917              | 0.9944 | 0.7671   | 0.9997 | -56.245  | 0.9955 |
|                                | rs598138    | 72438483 | 0.7917              | 0.9944 | 0.7757   | 0.9997 | -55.678  | 0.9954 |
|                                | rs680495    | 72445746 | 0.7917              | 0.9944 | 0.8274   | 1.0000 | -49.342  | 0.9944 |
|                                | rs590252    | 72461324 | 0.7917              | 0.9944 | 0.7757   | 0.9997 | -114.702 | 0.9996 |
|                                | rs641939    | 72464683 | 0.7917              | 0.9944 | 0.8361   | 1.0000 | -117.191 | 0.9996 |
|                                | rs630241    | 72475478 | 0.7917              | 0.9944 | 0.7843   | 0.9998 | -98.100  | 0.9990 |
|                                | rs628432    | 72477120 | 0.7917              | 0.9944 | 0.8274   | 1.0000 | -105.042 | 0.9993 |
|                                | rs659833    | 72496496 | 0.7917              | 0.9944 | 0.8361   | 1.0000 | -128.694 | 0.9998 |
|                                | rs3115351   | 72496883 | 0.7917              | 0.9944 | 0.7930   | 0.9998 | -134.552 | 0.9998 |
|                                | rs640610    | 72504445 | 0.7917              | 0.9944 | 0.8016   | 0.9999 | -162.704 | 0.9998 |
|                                | rs590345    | 72534217 | 0.6917              | 0.9944 | 0.6504   | 0.9978 | -249.056 | 0.9999 |
|                                | rs647242    | 72536445 | 0.7083              | 0.9944 | 0.6807   | 0.9986 | -241.526 | 0.9999 |
|                                | rs2203679   | 72542046 | 0.7083              | 0.9944 | 0.7234   | 0.9993 | -40.916  | 0.9917 |
|                                | rs653220    | 72561382 | 0.7083              | 0.9944 | 0.8010   | 0.9999 | -43.614  | 0.9928 |
|                                | rs6714595   | 72565756 | 0.7083              | 0.9944 | 0.8010   | 0.9999 | -45.510  | 0.9934 |
|                                | rs7577238   | 72649604 | 0.7083              | 0.9944 | 0.8010   | 0.9999 | -43.291  | 0.9927 |
|                                | rs11686713  | 72662046 | 0.7083              | 0.9944 | 0.7664   | 0.9996 | -48.474  | 0.9942 |
|                                | rs11677707  | 72732262 | 0.7083              | 0.9944 | 0.7837   | 0.9998 | -57.428  | 0.9957 |
|                                | rs6724529   | 72734249 | 0.7083              | 0.9944 | 0.7837   | 0.9998 | -57.583  | 0.9958 |
|                                | rs4852886   | 72736040 | 0.7083              | 0.9944 | 0.7148   | 0.9992 | -57.699  | 0.9958 |
|                                | rs11685114  | 72749123 | 0.7083              | 0.9944 | 0.8010   | 0.9999 | -96.929  | 0.9990 |
|                                | rs4852891   | 72798521 | 0.7250              | 0.9944 | 0.7983   | 0.9999 | -97.231  | 0.9990 |
|                                | rs7588400   | 72830661 | 0.7250              | 0.9944 | 0.7983   | 0.9999 | -74.699  | 0.9981 |
|                                | rs970577    | 72859087 | 0.8000              | 0.9389 | 0.5623   | 0.9917 | -63.924  | 0.9969 |
|                                | rs1876490   | 72905859 | 0.6833              | 0.9333 | 0.7049   | 0.9990 | -71.303  | 0.9977 |

Table 4: Continuation of Table 3.

| Chromosome<br>Pop A vs Pop B   | SNP<br>Name | Position | Derived Allele Freq |        | $F_{st}$ |        | xp-EHHST |        |
|--------------------------------|-------------|----------|---------------------|--------|----------|--------|----------|--------|
|                                |             |          | $p_A$               | $p_B$  | Value    | Pct    | Value    | Pct    |
| Chromosome 2<br>CHB+JPT vs YRI | rs975612    | 72242842 | 0.9722              | 0.0333 | 0.7248   | 0.9993 | 46.327   | 0.9904 |
|                                | rs194239    | 72250105 | 0.9722              | 0.1000 | 0.6591   | 0.9981 | 47.469   | 0.9911 |
|                                | rs9309464   | 72387471 | 0.9944              | 0.0083 | 0.8361   | 1.0000 | 118.192  | 0.9993 |
|                                | rs7595180   | 72389198 | 0.9944              | 0.0083 | 0.8320   | 1.0000 | 117.583  | 0.9993 |
|                                | rs6752122   | 72399186 | 0.9944              | 0.0167 | 0.8274   | 1.0000 | 58.364   | 0.9946 |
|                                | rs7558919   | 72402403 | 0.9944              | 0.0750 | 0.7671   | 0.9997 | 57.619   | 0.9945 |
|                                | rs6546764   | 72406443 | 0.9944              | 0.0667 | 0.7757   | 0.9997 | 57.785   | 0.9945 |
|                                | rs11126366  | 72407800 | 0.9944              | 0.1583 | 0.6810   | 0.9987 | 55.944   | 0.9941 |
|                                | rs2420444   | 72419965 | 0.9944              | 0.0083 | 0.8361   | 1.0000 | 57.624   | 0.9945 |
|                                | rs7594350   | 72425722 | 0.9944              | 0.0083 | 0.8361   | 1.0000 | 58.407   | 0.9947 |
|                                | rs7558686   | 72432297 | 0.9944              | 0.0667 | 0.7757   | 0.9997 | 58.665   | 0.9947 |
|                                | rs13390754  | 72437629 | 0.9944              | 0.0750 | 0.7671   | 0.9997 | 58.885   | 0.9947 |
|                                | rs598496    | 72438429 | 0.9944              | 0.0750 | 0.7671   | 0.9997 | 59.133   | 0.9948 |
|                                | rs598138    | 72438483 | 0.9944              | 0.0667 | 0.7757   | 0.9997 | 59.319   | 0.9948 |
|                                | rs680495    | 72445746 | 0.9944              | 0.0167 | 0.8274   | 1.0000 | 58.007   | 0.9946 |
|                                | rs590252    | 72461324 | 0.9944              | 0.0667 | 0.7757   | 0.9997 | 57.200   | 0.9944 |
|                                | rs641939    | 72464683 | 0.9944              | 0.0083 | 0.8361   | 1.0000 | 73.033   | 0.9972 |
|                                | rs630241    | 72475478 | 0.9944              | 0.0583 | 0.7843   | 0.9998 | 72.563   | 0.9970 |
|                                | rs628432    | 72477120 | 0.9944              | 0.0167 | 0.8274   | 1.0000 | 73.523   | 0.9972 |
|                                | rs659833    | 72496496 | 0.9944              | 0.0083 | 0.8361   | 1.0000 | 80.064   | 0.9979 |
|                                | rs3115351   | 72496883 | 0.9944              | 0.0500 | 0.7930   | 0.9998 | 79.699   | 0.9979 |
|                                | rs640610    | 72504445 | 0.9944              | 0.0417 | 0.8016   | 0.9999 | 84.456   | 0.9982 |
|                                | rs590345    | 72534217 | 0.9944              | 0.1500 | 0.6504   | 0.9978 | 91.708   | 0.9987 |
|                                | rs647242    | 72536445 | 0.9944              | 0.1250 | 0.6807   | 0.9986 | 92.998   | 0.9988 |
|                                | rs2203679   | 72542046 | 0.9944              | 0.0833 | 0.7234   | 0.9993 | 92.352   | 0.9987 |
|                                | rs653220    | 72561382 | 0.9944              | 0.0083 | 0.8010   | 0.9999 | 124.249  | 0.9994 |
|                                | rs6714595   | 72565756 | 0.9944              | 0.0083 | 0.8010   | 0.9999 | 126.399  | 0.9995 |
|                                | rs7577238   | 72649604 | 0.9944              | 0.0083 | 0.8010   | 0.9999 | 82.378   | 0.9981 |
|                                | rs11686713  | 72662046 | 0.9944              | 0.0417 | 0.7664   | 0.9996 | 94.734   | 0.9989 |
|                                | rs11677707  | 72732262 | 0.9944              | 0.0250 | 0.7837   | 0.9998 | 114.773  | 0.9992 |
|                                | rs6724529   | 72734249 | 0.9944              | 0.0250 | 0.7837   | 0.9998 | 115.608  | 0.9992 |
|                                | rs4852886   | 72736040 | 0.9944              | 0.0917 | 0.7148   | 0.9992 | 112.699  | 0.9992 |
|                                | rs11685114  | 72749123 | 0.9944              | 0.0083 | 0.8010   | 0.9999 | 104.541  | 0.9990 |
|                                | rs4852891   | 72798521 | 0.9944              | 0.0167 | 0.7983   | 0.9999 | 107.582  | 0.9991 |
|                                | rs7588400   | 72830661 | 0.9944              | 0.0167 | 0.7983   | 0.9999 | 92.594   | 0.9987 |
|                                | rs970577    | 72859087 | 0.9389              | 0.2000 | 0.5623   | 0.9917 | 70.206   | 0.9966 |
|                                | rs1876490   | 72905859 | 0.9333              | 0.0167 | 0.7049   | 0.9990 | 68.467   | 0.9964 |
|                                | rs10185826  | 72991499 | 0.9167              | 0.0500 | 0.6295   | 0.9972 | 46.884   | 0.9907 |

Table 5: Regions and SNPs which had highest xp-EHHST values, strongest differentiations, and high derived allele frequency in the tested population CHB+JPT ( $> 0.5$ ) on chromosome 2 of the HapMap phase II data. \* marked regions which were not reported in Table 1, Sabeti et al. (2007). **Abbreviations:** Freq — Frequency, Pop — Population, Pct — percentile.

| Chromosome<br>Pop A vs Pop B    | SNP<br>Name                     | Position  | Derived Allele Freq |        | $F_{st}$ |        | xp-EHHST |        |
|---------------------------------|---------------------------------|-----------|---------------------|--------|----------|--------|----------|--------|
|                                 |                                 |           | $p_A$               | $p_B$  | Value    | Pct    | Value    | Pct    |
| Chromosome 2*<br>CEU vs CHB+JPT | rs10188273                      | 103575435 | 0.3917              | 0.9444 | 0.6091   | 0.9960 | -47.887  | 0.9941 |
|                                 | rs4851660                       | 103584221 | 0.4583              | 0.9444 | 0.5779   | 0.9931 | -42.662  | 0.9924 |
|                                 | rs10189533                      | 103585672 | 0.4583              | 0.9444 | 0.5856   | 0.9939 | -44.548  | 0.9932 |
|                                 | rs10192716                      | 103586576 | 0.4583              | 0.9444 | 0.5933   | 0.9948 | -46.267  | 0.9938 |
|                                 | rs1451988                       | 103589021 | 0.4583              | 0.9444 | 0.5933   | 0.9948 | -49.190  | 0.9944 |
|                                 | rs6543223                       | 103594301 | 0.4583              | 0.9444 | 0.5933   | 0.9948 | -51.222  | 0.9948 |
|                                 | rs13396809                      | 103595295 | 0.4667              | 0.9444 | 0.5919   | 0.9945 | -53.984  | 0.9952 |
|                                 | rs7570362                       | 103597727 | 0.4583              | 0.9444 | 0.5933   | 0.9948 | -55.755  | 0.9954 |
|                                 | rs12328095                      | 103603254 | 0.4583              | 0.9389 | 0.5702   | 0.9923 | -58.333  | 0.9959 |
|                                 | rs6719978                       | 103604933 | 0.4583              | 0.9444 | 0.5856   | 0.9939 | -60.321  | 0.9962 |
|                                 | rs1584705                       | 103606168 | 0.4583              | 0.9444 | 0.5779   | 0.9931 | -60.937  | 0.9963 |
|                                 | rs11123965                      | 103606637 | 0.4583              | 0.9444 | 0.5933   | 0.9948 | -61.424  | 0.9964 |
|                                 | rs11888473                      | 103606852 | 0.4583              | 0.9444 | 0.5779   | 0.9931 | -61.791  | 0.9965 |
|                                 | Chromosome 2*<br>CHB+JPT vs YRI | rs1514999 | 103484100           | 0.9333 | 0.1000   | 0.5993 | 0.9953   | 53.093 |
| rs1399547                       |                                 | 103488883 | 0.9333              | 0.1167 | 0.5833   | 0.9936 | 51.844   | 0.9928 |
| rs7573399                       |                                 | 103489666 | 0.9333              | 0.1167 | 0.5833   | 0.9936 | 51.345   | 0.9926 |
| rs17336454                      |                                 | 103490578 | 0.9333              | 0.1167 | 0.5833   | 0.9936 | 50.196   | 0.9922 |
| rs7584767                       |                                 | 103490795 | 0.9333              | 0.1250 | 0.5754   | 0.9927 | 49.079   | 0.9917 |
| rs4283441                       |                                 | 103491828 | 0.9333              | 0.1167 | 0.5833   | 0.9936 | 48.621   | 0.9915 |
| rs10192716                      |                                 | 103586576 | 0.9444              | 0.1250 | 0.5933   | 0.9948 | 65.327   | 0.9958 |
| rs1451988                       |                                 | 103589021 | 0.9444              | 0.1250 | 0.5933   | 0.9948 | 66.206   | 0.9960 |
| rs6543223                       |                                 | 103594301 | 0.9444              | 0.1250 | 0.5933   | 0.9948 | 66.707   | 0.9960 |
| rs13396809                      |                                 | 103595295 | 0.9444              | 0.1250 | 0.5919   | 0.9945 | 67.102   | 0.9961 |
| rs7570362                       |                                 | 103597727 | 0.9444              | 0.1250 | 0.5933   | 0.9948 | 79.237   | 0.9979 |
| rs12328095                      |                                 | 103603254 | 0.9389              | 0.1417 | 0.5702   | 0.9923 | 79.803   | 0.9979 |
| rs6719978                       |                                 | 103604933 | 0.9444              | 0.1333 | 0.5856   | 0.9939 | 78.725   | 0.9978 |
| rs1584705                       |                                 | 103606168 | 0.9444              | 0.1417 | 0.5779   | 0.9931 | 78.387   | 0.9978 |
| rs11123965                      |                                 | 103606637 | 0.9444              | 0.1250 | 0.5933   | 0.9948 | 78.680   | 0.9978 |
| rs11888473                      |                                 | 103606852 | 0.9444              | 0.1417 | 0.5779   | 0.9931 | 78.333   | 0.9978 |

Table 6: Regions and SNPs which had highest xp-EHHST values, strongest differentiations, and high derived allele frequency in the tested population CHB+JPT ( $> 0.5$ ) on chromosome 2 of the HapMap phase II data. **Abbreviations:** Freq — Frequency, Pop — Population, Pct — percentile. In the first column, the **Genes** provided names and positions of genes which were located in a region.

| Chromosome<br>Pop A vs Pop B                                                                                | SNP<br>Name | Position  | Derived Allele Freq |        | $F_{st}$ |         | xp-EHHST |        |
|-------------------------------------------------------------------------------------------------------------|-------------|-----------|---------------------|--------|----------|---------|----------|--------|
|                                                                                                             |             |           | $p_A$               | $p_B$  | Value    | Pct     | Value    | Pct    |
| Chromosome 2<br>CEU vs CHB+JPT<br><i>EDAR</i><br>(108,877-108,972kb)<br><i>LIMS1</i><br>(108,571-108,670kb) | rs7573311   | 107158083 | 0.7833              | 0.9556 | 0.6474   | 0.9977  | -53.442  | 0.9951 |
|                                                                                                             | rs10185491  | 107159431 | 0.7833              | 0.9556 | 0.6474   | 0.9977  | -48.296  | 0.9942 |
|                                                                                                             | rs2215482   | 107160678 | 0.7833              | 0.9556 | 0.6474   | 0.9977  | -47.814  | 0.9941 |
|                                                                                                             | rs10184143  | 107161280 | 0.4833              | 0.8833 | 0.5843   | 0.9937  | -42.759  | 0.9925 |
|                                                                                                             | rs17036137  | 108303137 | 0.0667              | 0.8500 | 0.7593   | 0.9996  | -70.695  | 0.9976 |
|                                                                                                             | rs12476238  | 108306768 | 0.1500              | 0.8500 | 0.6538   | 0.9979  | -67.982  | 0.9974 |
|                                                                                                             | rs973507    | 108316852 | 0.8583              | 0.9389 | 0.5795   | 0.9932  | -47.841  | 0.9941 |
|                                                                                                             | rs13414622  | 108326212 | 0.8583              | 0.9111 | 0.5527   | 0.9904  | -47.318  | 0.9940 |
|                                                                                                             | rs1402467   | 108361240 | 0.8083              | 0.8833 | 0.6540   | 0.9979  | -42.779  | 0.9925 |
|                                                                                                             | rs4149432   | 108361757 | 0.8083              | 0.8833 | 0.5615   | 0.9915  | -42.451  | 0.9923 |
|                                                                                                             | rs4149438   | 108368480 | 0.8000              | 0.8833 | 0.5568   | 0.9910  | -40.465  | 0.9916 |
|                                                                                                             | rs10179602  | 108451805 | 0.3833              | 0.8722 | 0.6124   | 0.9962  | -70.931  | 0.9977 |
|                                                                                                             | rs1053027   | 108457987 | 0.3833              | 0.8778 | 0.5534   | 0.9905  | -73.547  | 0.9980 |
|                                                                                                             | rs2077472   | 108492518 | 0.3833              | 0.8944 | 0.5670   | 0.9921  | -72.573  | 0.9979 |
|                                                                                                             | rs12613554  | 108527107 | 0.3917              | 0.8722 | 0.6190   | 0.9966  | -73.656  | 0.9980 |
|                                                                                                             | rs12473539  | 108531804 | 0.3917              | 0.8722 | 0.5520   | 0.9903  | -74.124  | 0.9981 |
|                                                                                                             | rs1469965   | 108536852 | 0.3917              | 0.8722 | 0.5520   | 0.9903  | -72.399  | 0.9979 |
|                                                                                                             | rs10179040  | 108552213 | 0.3917              | 0.8722 | 0.5520   | 0.9903  | -71.520  | 0.9977 |
|                                                                                                             | rs11123708  | 108562291 | 0.3917              | 0.8722 | 0.5520   | 0.9903  | -69.590  | 0.9975 |
|                                                                                                             | rs10187016  | 108563195 | 0.3833              | 0.8778 | 0.5613   | 0.9915  | -69.873  | 0.9976 |
|                                                                                                             | rs13413437  | 108564962 | 0.3917              | 0.8722 | 0.5520   | 0.9903  | -68.465  | 0.9975 |
|                                                                                                             | rs13422997  | 108572896 | 0.3917              | 0.8722 | 0.5520   | 0.9903  | -62.300  | 0.9966 |
|                                                                                                             | rs7565372   | 108587342 | 0.3917              | 0.8722 | 0.5520   | 0.9903  | -62.187  | 0.9966 |
|                                                                                                             | rs6707379   | 108600999 | 0.3917              | 0.8722 | 0.5601   | 0.9914  | -61.800  | 0.9965 |
|                                                                                                             | rs12469016  | 108622967 | 0.3917              | 0.8722 | 0.5601   | 0.9914  | -64.854  | 0.9970 |
|                                                                                                             | rs6542785   | 108922506 | 0.1500              | 0.9444 | 0.5688   | 0.9922  | -38.045  | 0.9907 |
|                                                                                                             | rs260698    | 108933191 | 0.1333              | 0.9611 | 0.6015   | 0.9954  | -41.741  | 0.9920 |
|                                                                                                             | rs260699    | 108933877 | 0.1333              | 0.9833 | 0.6905   | 0.9988  | -42.178  | 0.9922 |
|                                                                                                             | rs260702    | 108935390 | 0.1333              | 0.9611 | 0.6015   | 0.9954  | -41.950  | 0.9921 |
|                                                                                                             | rs260686    | 108944605 | 0.1000              | 0.9556 | 0.6253   | 0.9970  | -41.288  | 0.9918 |
|                                                                                                             | rs260690    | 108946170 | 0.1000              | 0.9611 | 0.6378   | 0.9974  | -41.494  | 0.9919 |
|                                                                                                             | rs260692    | 108947751 | 0.1000              | 0.9611 | 0.6542   | 0.9979  | -41.031  | 0.9918 |
|                                                                                                             | rs5021634   | 108948789 | 0.1500              | 0.9500 | 0.5974   | 0.9951  | -39.157  | 0.9911 |
| rs10174266                                                                                                  | 108949745   | 0.2000    | 0.9556              | 0.5529 | 0.9904   | -40.902 | 0.9917   |        |
| rs11123719                                                                                                  | 108952803   | 0.1583    | 0.8722              | 0.5546 | 0.9906   | -38.305 | 0.9908   |        |
| rs12622467                                                                                                  | 108953929   | 0.1583    | 0.8722              | 0.5546 | 0.9906   | -38.548 | 0.9909   |        |
| rs4676046                                                                                                   | 108954334   | 0.1583    | 0.8722              | 0.5546 | 0.9906   | -38.643 | 0.9909   |        |
| rs17034770                                                                                                  | 108982808   | 0.1583    | 0.8778              | 0.6421 | 0.9975   | -54.924 | 0.9953   |        |

Table 7: Continuation of 6.

| Chromosome<br>Pop A vs Pop B        | SNP<br>Name | Position  | Derived Allele Freq |        | $F_{st}$ |        | xp-EHHST |        |
|-------------------------------------|-------------|-----------|---------------------|--------|----------|--------|----------|--------|
|                                     |             |           | $p_A$               | $p_B$  | Value    | Pct    | Value    | Pct    |
| Chromosome 2<br>CHB+JPT vs YRI      | rs17036137  | 108303137 | 0.8500              | 0.0167 | 0.7593   | 0.9996 | 81.939   | 0.9981 |
|                                     | rs12476238  | 108306768 | 0.8500              | 0.0667 | 0.6538   | 0.9979 | 77.819   | 0.9978 |
| <i>EDAR</i><br>(108,877-108,972kb)  | rs973507    | 108316852 | 0.9389              | 0.2167 | 0.5795   | 0.9932 | 70.274   | 0.9967 |
|                                     | rs13414622  | 108326212 | 0.9111              | 0.2083 | 0.5527   | 0.9904 | 67.280   | 0.9962 |
| <i>LIMS1</i><br>(108,571-108,670kb) | rs1402467   | 108361240 | 0.8833              | 0.0583 | 0.6540   | 0.9979 | 52.983   | 0.9933 |
|                                     | rs4149432   | 108361757 | 0.8833              | 0.1417 | 0.5615   | 0.9915 | 52.394   | 0.9931 |
|                                     | rs4149438   | 108368480 | 0.8833              | 0.1417 | 0.5568   | 0.9910 | 50.055   | 0.9921 |
|                                     | rs10179602  | 108451805 | 0.8722              | 0.0250 | 0.6124   | 0.9962 | 100.244  | 0.9990 |
|                                     | rs1053027   | 108457987 | 0.8778              | 0.0917 | 0.5534   | 0.9905 | 93.177   | 0.9988 |
|                                     | rs2077472   | 108492518 | 0.8944              | 0.1000 | 0.5670   | 0.9921 | 87.384   | 0.9983 |
|                                     | rs12613554  | 108527107 | 0.8722              | 0.0167 | 0.6190   | 0.9966 | 89.880   | 0.9985 |
|                                     | rs12473539  | 108531804 | 0.8722              | 0.0833 | 0.5520   | 0.9903 | 89.854   | 0.9985 |
|                                     | rs1469965   | 108536852 | 0.8722              | 0.0833 | 0.5520   | 0.9903 | 75.907   | 0.9975 |
|                                     | rs10179040  | 108552213 | 0.8722              | 0.0833 | 0.5520   | 0.9903 | 75.665   | 0.9975 |
|                                     | rs11123708  | 108562291 | 0.8722              | 0.0833 | 0.5520   | 0.9903 | 74.032   | 0.9973 |
|                                     | rs10187016  | 108563195 | 0.8778              | 0.0833 | 0.5613   | 0.9915 | 73.963   | 0.9973 |
|                                     | rs13413437  | 108564962 | 0.8722              | 0.0833 | 0.5520   | 0.9903 | 71.463   | 0.9969 |
|                                     | rs13422997  | 108572896 | 0.8722              | 0.0833 | 0.5520   | 0.9903 | 120.544  | 0.9994 |
|                                     | rs7565372   | 108587342 | 0.8722              | 0.0833 | 0.5520   | 0.9903 | 128.192  | 0.9995 |
|                                     | rs6707379   | 108600999 | 0.8722              | 0.0750 | 0.5601   | 0.9914 | 130.025  | 0.9996 |
|                                     | rs12469016  | 108622967 | 0.8722              | 0.0750 | 0.5601   | 0.9914 | 227.857  | 0.9999 |
|                                     | rs6542785   | 108922506 | 0.9444              | 0.4667 | 0.5688   | 0.9922 | 49.193   | 0.9918 |
|                                     | rs260698    | 108933191 | 0.9611              | 0.5917 | 0.6015   | 0.9954 | 50.648   | 0.9924 |
|                                     | rs260699    | 108933877 | 0.9833              | 0.7917 | 0.6905   | 0.9988 | 51.773   | 0.9928 |
|                                     | rs260702    | 108935390 | 0.9611              | 0.5917 | 0.6015   | 0.9954 | 51.011   | 0.9925 |
|                                     | rs260686    | 108944605 | 0.9556              | 0.5333 | 0.6253   | 0.9970 | 50.887   | 0.9925 |
|                                     | rs260690    | 108946170 | 0.9611              | 0.6167 | 0.6378   | 0.9974 | 51.186   | 0.9926 |
|                                     | rs260692    | 108947751 | 0.9611              | 0.6917 | 0.6542   | 0.9979 | 49.798   | 0.9920 |
|                                     | rs5021634   | 108948789 | 0.9500              | 0.7250 | 0.5974   | 0.9951 | 47.769   | 0.9912 |
|                                     | rs10174266  | 108949745 | 0.9556              | 0.7250 | 0.5529   | 0.9904 | 48.133   | 0.9914 |
|                                     | rs11123719  | 108952803 | 0.8722              | 0.2333 | 0.5546   | 0.9906 | 46.438   | 0.9904 |
|                                     | rs12622467  | 108953929 | 0.8722              | 0.2333 | 0.5546   | 0.9906 | 47.091   | 0.9908 |
|                                     | rs4676046   | 108954334 | 0.8722              | 0.2333 | 0.5546   | 0.9906 | 47.239   | 0.9909 |
|                                     | rs17034770  | 108982808 | 0.8778              | 0.1167 | 0.6421   | 0.9975 | 68.662   | 0.9964 |



Table 8: Regions and SNPs which had highest xp-EHHST values, strongest differentiations, and high derived allele frequency in the tested population CHB+JPT ( $> 0.5$ ) on chromosome 3 of the HapMap phase II data.  
 \* marked regions which were not reported in Table 1, Sabeti et al. (2007).

| Chromosome<br>Pop A vs Pop B    | SNP<br>Name | Position  | Derived Allele Freq |        | $F_{st}$ |         | xp-EHHST |        |
|---------------------------------|-------------|-----------|---------------------|--------|----------|---------|----------|--------|
|                                 |             |           | $p_A$               | $p_B$  | Value    | Pct     | Value    | Pct    |
| Chromosome 3*<br>CEU vs CHB+JPT | rs9827968   | 106178646 | 0.4250              | 0.8556 | 0.5404   | 0.9915  | -52.959  | 0.9989 |
|                                 | rs1503079   | 106241722 | 0.4917              | 0.9278 | 0.5577   | 0.9933  | -44.392  | 0.9981 |
|                                 | rs1566718   | 106244327 | 0.4917              | 0.9278 | 0.5497   | 0.9926  | -44.231  | 0.9980 |
|                                 | rs1566717   | 106250199 | 0.4917              | 0.9278 | 0.5497   | 0.9925  | -42.773  | 0.9977 |
|                                 | rs13090983  | 106250823 | 0.4917              | 0.9278 | 0.5497   | 0.9926  | -42.386  | 0.9976 |
|                                 | rs12633740  | 106252196 | 0.4917              | 0.9278 | 0.5497   | 0.9926  | -40.853  | 0.9973 |
|                                 | rs12637494  | 106256655 | 0.4917              | 0.9278 | 0.5497   | 0.9925  | -41.871  | 0.9975 |
|                                 | rs10933802  | 106256994 | 0.4917              | 0.9278 | 0.5497   | 0.9925  | -42.286  | 0.9976 |
|                                 | rs10933803  | 106257871 | 0.4917              | 0.9278 | 0.6401   | 0.9981  | -41.857  | 0.9975 |
|                                 | rs2047806   | 106261500 | 0.5250              | 0.9778 | 0.6091   | 0.9965  | -40.948  | 0.9973 |
|                                 | rs2134526   | 106262934 | 0.4917              | 0.9278 | 0.5497   | 0.9925  | -40.281  | 0.9972 |
|                                 | rs6800325   | 106265702 | 0.5417              | 0.9778 | 0.6161   | 0.9969  | -52.181  | 0.9988 |
|                                 | rs10933807  | 106267020 | 0.4917              | 0.9278 | 0.5497   | 0.9925  | -55.088  | 0.9990 |
|                                 | rs2895296   | 106271452 | 0.4917              | 0.9278 | 0.5737   | 0.9946  | -57.225  | 0.9992 |
|                                 | rs1503084   | 106274502 | 0.4917              | 0.9278 | 0.5737   | 0.9946  | -39.166  | 0.9970 |
|                                 | rs10933809  | 106283040 | 0.4917              | 0.9278 | 0.5737   | 0.9946  | -45.628  | 0.9982 |
|                                 | rs1503085   | 106284786 | 0.4917              | 0.9278 | 0.5737   | 0.9946  | -46.426  | 0.9983 |
|                                 | rs1503075   | 106289543 | 0.4167              | 0.9056 | 0.6051   | 0.9963  | -57.054  | 0.9991 |
|                                 | rs1503158   | 106297795 | 0.3917              | 0.9056 | 0.6110   | 0.9966  | -77.714  | 0.9997 |
|                                 | rs12492439  | 106299176 | 0.4000              | 0.9056 | 0.6418   | 0.9982  | -80.223  | 0.9998 |
| rs870279                        | 106305849   | 0.4000    | 0.8889              | 0.5793 | 0.9951   | -81.354 | 0.9998   |        |
| rs12492301                      | 106306013   | 0.4000    | 0.8889              | 0.5874 | 0.9956   | -82.066 | 0.9998   |        |
| Chromosome 3*<br>CHB+JPT vs YRI | rs9827968   | 106178646 | 0.8556              | 0.0667 | 0.5404   | 0.9915  | 50.357   | 0.9980 |
|                                 | rs1503079   | 106241722 | 0.9278              | 0.1333 | 0.5577   | 0.9933  | 56.034   | 0.9988 |
|                                 | rs1566718   | 106244327 | 0.9278              | 0.1417 | 0.5497   | 0.9926  | 55.847   | 0.9988 |
|                                 | rs1566717   | 106250199 | 0.9278              | 0.1417 | 0.5497   | 0.9925  | 55.929   | 0.9988 |
|                                 | rs13090983  | 106250823 | 0.9278              | 0.1417 | 0.5497   | 0.9926  | 55.512   | 0.9988 |
|                                 | rs12633740  | 106252196 | 0.9278              | 0.1417 | 0.5497   | 0.9926  | 54.933   | 0.9987 |
|                                 | rs12637494  | 106256655 | 0.9278              | 0.1417 | 0.5497   | 0.9925  | 54.603   | 0.9987 |
|                                 | rs10933802  | 106256994 | 0.9278              | 0.1417 | 0.5497   | 0.9925  | 54.082   | 0.9986 |
|                                 | rs10933803  | 106257871 | 0.9278              | 0.0500 | 0.6401   | 0.9981  | 54.704   | 0.9987 |
|                                 | rs2047806   | 106261500 | 0.9778              | 0.1500 | 0.6091   | 0.9965  | 51.260   | 0.9982 |
|                                 | rs2134526   | 106262934 | 0.9278              | 0.1417 | 0.5497   | 0.9925  | 49.904   | 0.9979 |
|                                 | rs6800325   | 106265702 | 0.9778              | 0.1417 | 0.6161   | 0.9969  | 61.490   | 0.9994 |
|                                 | rs10933807  | 106267020 | 0.9278              | 0.1417 | 0.5497   | 0.9925  | 61.051   | 0.9994 |
|                                 | rs2895296   | 106271452 | 0.9278              | 0.1167 | 0.5737   | 0.9946  | 60.956   | 0.9994 |
|                                 | rs1503084   | 106274502 | 0.9278              | 0.1167 | 0.5737   | 0.9946  | 43.465   | 0.9959 |
|                                 | rs10933809  | 106283040 | 0.9278              | 0.1167 | 0.5737   | 0.9946  | 46.421   | 0.9969 |
|                                 | rs1503085   | 106284786 | 0.9278              | 0.1167 | 0.5737   | 0.9946  | 47.005   | 0.9971 |
|                                 | rs1503075   | 106289543 | 0.9056              | 0.0667 | 0.6051   | 0.9963  | 48.138   | 0.9974 |
|                                 | rs1503158   | 106297795 | 0.9056              | 0.0667 | 0.6110   | 0.9966  | 52.199   | 0.9983 |
|                                 | rs12492439  | 106299176 | 0.9056              | 0.0333 | 0.6418   | 0.9982  | 53.006   | 0.9984 |
| rs870279                        | 106305849   | 0.8889    | 0.0750              | 0.5793 | 0.9951   | 50.073  | 0.9979   |        |
| rs12492301                      | 106306013   | 0.8889    | 0.0667              | 0.5874 | 0.9956   | 50.335  | 0.9979   |        |

Table 9: Regions and SNPs which had highest xp-EHHST values, strongest differentiations, and high derived allele frequency in the tested population CHB+JPT ( $> 0.5$ ) on chromosome 3 of the HapMap phase II data.  
\* marked regions which were not reported in Table 1, Sabeti et al. (2007).

| Chromosome<br>Pop A vs Pop B    | SNP<br>Name | Position  | Derived Allele Freq |        | $F_{st}$ |        | xp-EHHST |        |
|---------------------------------|-------------|-----------|---------------------|--------|----------|--------|----------|--------|
|                                 |             |           | $p_A$               | $p_B$  | Value    | Pct    | Value    | Pct    |
| Chromosome 3*<br>CEU vs CHB+JPT | rs709437    | 109117646 | 0.3583              | 0.9056 | 0.5819   | 0.9953 | -39.085  | 0.9970 |
|                                 | rs697953    | 109117907 | 0.4917              | 0.9722 | 0.5670   | 0.9940 | -38.852  | 0.9970 |
|                                 | rs3866221   | 109118340 | 0.3583              | 0.9000 | 0.5898   | 0.9957 | -37.588  | 0.9967 |
|                                 | rs13086279  | 109123223 | 0.3500              | 0.9000 | 0.5927   | 0.9958 | -34.877  | 0.9963 |
|                                 | rs9831003   | 109127806 | 0.3917              | 0.8667 | 0.5697   | 0.9943 | -32.848  | 0.9960 |
|                                 | rs13322639  | 109128689 | 0.3917              | 0.8667 | 0.5697   | 0.9943 | -31.047  | 0.9950 |
|                                 | rs9837335   | 109129497 | 0.3583              | 0.8556 | 0.5650   | 0.9938 | -27.640  | 0.9924 |
|                                 | rs1370286   | 109132289 | 0.3917              | 0.8667 | 0.5780   | 0.9949 | -26.962  | 0.9919 |
|                                 | rs6437776   | 109571738 | 0.0917              | 0.8556 | 0.6455   | 0.9983 | -28.967  | 0.9934 |
|                                 | rs9874204   | 109577817 | 0.0917              | 0.8556 | 0.6455   | 0.9983 | -29.031  | 0.9934 |
|                                 | rs1463426   | 109578788 | 0.0917              | 0.8556 | 0.6455   | 0.9983 | -29.750  | 0.9940 |
| Chromosome 3*<br>CHB+JPT vs YRI | rs709437    | 109117646 | 0.9056              | 0.1083 | 0.5819   | 0.9953 | 41.630   | 0.9953 |
|                                 | rs697953    | 109117907 | 0.9722              | 0.1917 | 0.5670   | 0.9940 | 41.147   | 0.9952 |
|                                 | rs3866221   | 109118340 | 0.9000              | 0.0917 | 0.5898   | 0.9957 | 40.846   | 0.9951 |
|                                 | rs13086279  | 109123223 | 0.9000              | 0.0917 | 0.5927   | 0.9958 | 36.763   | 0.9933 |
|                                 | rs9831003   | 109127806 | 0.8667              | 0.0583 | 0.5697   | 0.9943 | 35.162   | 0.9927 |
|                                 | rs13322639  | 109128689 | 0.8667              | 0.0583 | 0.5697   | 0.9943 | 34.735   | 0.9925 |
|                                 | rs9837335   | 109129497 | 0.8556              | 0.0583 | 0.5650   | 0.9938 | 34.406   | 0.9924 |
|                                 | rs1370286   | 109132289 | 0.8667              | 0.0500 | 0.5780   | 0.9949 | 34.244   | 0.9923 |
|                                 | rs6437776   | 109571738 | 0.8556              | 0.1417 | 0.6455   | 0.9983 | 45.935   | 0.9968 |
|                                 | rs9874204   | 109577817 | 0.8556              | 0.1417 | 0.6455   | 0.9983 | 46.092   | 0.9968 |
|                                 | rs1463426   | 109578788 | 0.8556              | 0.1417 | 0.6455   | 0.9983 | 48.670   | 0.9976 |

Table 10: Regions and SNPs which had highest xp-EHHST values, strongest differentiations, and high derived allele frequency in the tested population CHB+JPT ( $> 0.5$ ) on chromosome 3 of the HapMap phase II data. \* marked regions which were not reported in Table 1, Sabeti et al. (2007).

| Chromosome<br>Pop A vs Pop B    | SNP<br>Name | Position | Derived Allele Freq |        | $F_{st}$ |         | xp-EHHST |        |
|---------------------------------|-------------|----------|---------------------|--------|----------|---------|----------|--------|
|                                 |             |          | $p_A$               | $p_B$  | Value    | Pct     | Value    | Pct    |
| Chromosome 3*<br>CEU vs CHB+JPT | rs9851518   | 17430401 | 0.4917              | 0.9444 | 0.5649   | 0.9938  | -29.492  | 0.9938 |
|                                 | rs6442682   | 17436735 | 0.4917              | 0.9444 | 0.5727   | 0.9946  | -30.525  | 0.9946 |
|                                 | rs7625855   | 17445786 | 0.4917              | 0.9444 | 0.5727   | 0.9946  | -31.929  | 0.9956 |
|                                 | rs1446303   | 17457568 | 0.4917              | 0.9444 | 0.5727   | 0.9946  | -32.236  | 0.9957 |
|                                 | rs9823064   | 17495226 | 0.4917              | 0.9444 | 0.5727   | 0.9946  | -35.023  | 0.9963 |
|                                 | rs9310520   | 17552380 | 0.4500              | 0.9444 | 0.5795   | 0.9951  | -36.622  | 0.9966 |
|                                 | rs13320647  | 17564884 | 0.4833              | 0.9444 | 0.5738   | 0.9946  | -35.322  | 0.9963 |
|                                 | rs9310526   | 17618038 | 0.4833              | 0.9444 | 0.5282   | 0.9900  | -73.273  | 0.9996 |
|                                 | rs9310527   | 17636766 | 0.4417              | 0.9389 | 0.5812   | 0.9953  | -75.229  | 0.9996 |
|                                 | rs9310528   | 17636936 | 0.4833              | 0.9444 | 0.5584   | 0.9933  | -73.172  | 0.9996 |
|                                 | rs9839588   | 17642282 | 0.4833              | 0.9444 | 0.5584   | 0.9933  | -69.122  | 0.9995 |
|                                 | rs11128836  | 17658896 | 0.4833              | 0.9444 | 0.5282   | 0.9900  | -30.470  | 0.9946 |
|                                 | rs4377510   | 17661292 | 0.4833              | 0.9444 | 0.5282   | 0.9900  | -30.093  | 0.9943 |
|                                 | rs6807020   | 17667819 | 0.4833              | 0.9444 | 0.5282   | 0.9900  | -29.419  | 0.9938 |
|                                 | rs13096559  | 17669647 | 0.4917              | 0.9722 | 0.5670   | 0.9940  | -28.961  | 0.9934 |
|                                 | rs11128838  | 17672372 | 0.4833              | 0.9444 | 0.5507   | 0.9926  | -28.585  | 0.9931 |
|                                 | rs6789697   | 17675712 | 0.4917              | 0.9722 | 0.5670   | 0.9940  | -28.093  | 0.9927 |
|                                 | rs6784025   | 17676062 | 0.4833              | 0.9444 | 0.5282   | 0.9900  | -27.674  | 0.9924 |
| rs7651998                       | 17686131    | 0.4833   | 0.9444              | 0.5282 | 0.9900   | -28.707 | 0.9932   |        |
| Chromosome 3*<br>CHB+JPT vs YRI | rs9851518   | 17430401 | 0.9444              | 0.1500 | 0.5649   | 0.9938  | 41.711   | 0.9953 |
|                                 | rs6442682   | 17436735 | 0.9444              | 0.1417 | 0.5727   | 0.9946  | 41.559   | 0.9953 |
|                                 | rs7625855   | 17445786 | 0.9444              | 0.1417 | 0.5727   | 0.9946  | 42.745   | 0.9957 |
|                                 | rs1446303   | 17457568 | 0.9444              | 0.1417 | 0.5727   | 0.9946  | 43.385   | 0.9959 |
|                                 | rs9823064   | 17495226 | 0.9444              | 0.1417 | 0.5727   | 0.9946  | 51.098   | 0.9981 |
|                                 | rs9310520   | 17552380 | 0.9444              | 0.1417 | 0.5795   | 0.9951  | 49.457   | 0.9977 |
|                                 | rs13320647  | 17564884 | 0.9444              | 0.1417 | 0.5738   | 0.9946  | 48.194   | 0.9975 |
|                                 | rs9310526   | 17618038 | 0.9444              | 0.1917 | 0.5282   | 0.9900  | 37.015   | 0.9935 |
|                                 | rs9310527   | 17636766 | 0.9389              | 0.1333 | 0.5812   | 0.9953  | 37.688   | 0.9938 |
|                                 | rs9310528   | 17636936 | 0.9444              | 0.1583 | 0.5584   | 0.9933  | 37.857   | 0.9939 |
|                                 | rs9839588   | 17642282 | 0.9444              | 0.1583 | 0.5584   | 0.9933  | 36.468   | 0.9932 |
|                                 | rs11128836  | 17658896 | 0.9444              | 0.1917 | 0.5282   | 0.9900  | 33.702   | 0.9920 |
|                                 | rs4377510   | 17661292 | 0.9444              | 0.1917 | 0.5282   | 0.9900  | 33.480   | 0.9918 |
|                                 | rs6807020   | 17667819 | 0.9444              | 0.1917 | 0.5282   | 0.9900  | 32.779   | 0.9914 |
|                                 | rs13096559  | 17669647 | 0.9722              | 0.1917 | 0.5670   | 0.9940  | 32.270   | 0.9908 |
|                                 | rs11128838  | 17672372 | 0.9444              | 0.1667 | 0.5507   | 0.9926  | 32.025   | 0.9906 |

Table 11: Regions and SNPs which had highest xp-EHHST values, strongest differentiations, and high derived allele frequency in the tested population CHB+JPT ( $> 0.5$ ) on chromosome 4 of the HapMap phase II data. # marked regions which are close to candidate regions reported in Table 1, Sabeti et al. (2007). In the first column, the **Genes** provided names and positions of genes.

| Chromosome<br>Pop A vs Pop B | SNP<br>Name | Position | Derived Allele Freq |        | $F_{st}$ |        | xp-EHHST |        |
|------------------------------|-------------|----------|---------------------|--------|----------|--------|----------|--------|
|                              |             |          | $p_A$               | $p_B$  | Value    | Pct    | Value    | Pct    |
| Chromosome 4#                | rs714226    | 41521093 | 0.9333              | 0.9944 | 0.6948   | 0.9988 | -33.992  | 0.9992 |
| CEU vs CHB+JPT               | rs6840961   | 41522632 | 0.8417              | 0.9833 | 0.6237   | 0.9962 | -33.945  | 0.9992 |
| <i>CCDC4</i>                 | rs9991121   | 41523790 | 0.8500              | 0.9778 | 0.7251   | 0.9993 | -31.920  | 0.9986 |
| (41,808-41,850kb),           | rs4623048   | 41528244 | 0.7583              | 0.9611 | 0.7677   | 0.9999 | -31.371  | 0.9985 |
| <i>TMEM33</i>                | rs9998239   | 41529367 | 0.9083              | 0.9722 | 0.6728   | 0.9983 | -31.742  | 0.9986 |
| (41,632-41,653kb),           | rs6839376   | 41544538 | 0.8000              | 0.9611 | 0.6990   | 0.9990 | -30.599  | 0.9982 |
| <i>WDR21B</i>                | rs6447118   | 41550330 | 0.8000              | 0.9611 | 0.6990   | 0.9990 | -30.045  | 0.9981 |
| (41,679-41,680kb),           | rs7356183   | 41554214 | 0.8083              | 0.9611 | 0.7035   | 0.9991 | -29.863  | 0.9980 |
|                              | rs7660832   | 41584424 | 0.7833              | 0.9611 | 0.5411   | 0.9900 | -26.425  | 0.9972 |
|                              | rs2660343   | 41672523 | 0.7333              | 0.9778 | 0.7001   | 0.9990 | -16.789  | 0.9902 |
|                              | rs2660335   | 41680446 | 0.7583              | 0.9667 | 0.6951   | 0.9989 | -47.429  | 0.9998 |
|                              | rs2581435   | 41685047 | 0.7583              | 0.9667 | 0.6951   | 0.9989 | -46.738  | 0.9997 |
|                              | rs4540084   | 41696545 | 0.7583              | 0.9667 | 0.6951   | 0.9989 | -42.052  | 0.9997 |
|                              | rs2660331   | 41696942 | 0.7583              | 0.9667 | 0.6951   | 0.9989 | -41.933  | 0.9997 |
|                              | rs2581455   | 41697890 | 0.7333              | 0.9667 | 0.7201   | 0.9993 | -40.896  | 0.9996 |
|                              | rs2660330   | 41698140 | 0.7667              | 0.9667 | 0.6989   | 0.9989 | -34.171  | 0.9993 |
|                              | rs1047626   | 41698428 | 0.7333              | 0.9667 | 0.7201   | 0.9993 | -33.640  | 0.9991 |
|                              | rs2581453   | 41698592 | 0.7583              | 0.9722 | 0.7027   | 0.9990 | -34.030  | 0.9992 |
|                              | rs2660329   | 41700744 | 0.7583              | 0.9667 | 0.6336   | 0.9969 | -34.060  | 0.9992 |
|                              | rs2660326   | 41701828 | 0.7583              | 0.9667 | 0.6336   | 0.9968 | -33.996  | 0.9992 |
|                              | rs2660325   | 41701960 | 0.7583              | 0.9667 | 0.6336   | 0.9969 | -34.001  | 0.9992 |
|                              | rs2581449   | 41701981 | 0.7583              | 0.9667 | 0.6336   | 0.9969 | -34.004  | 0.9992 |
|                              | rs2581448   | 41702151 | 0.7583              | 0.9667 | 0.6336   | 0.9969 | -34.001  | 0.9992 |
|                              | rs2660323   | 41702769 | 0.7583              | 0.9667 | 0.6336   | 0.9969 | -33.990  | 0.9992 |
|                              | rs9884564   | 41703000 | 0.7333              | 0.9722 | 0.7540   | 0.9997 | -33.450  | 0.9990 |
|                              | rs2581443   | 41703898 | 0.7583              | 0.9667 | 0.6336   | 0.9969 | -33.564  | 0.9991 |
|                              | rs2660319   | 41705641 | 0.7333              | 0.9667 | 0.6760   | 0.9985 | -33.203  | 0.9990 |
|                              | rs2581441   | 41706727 | 0.7333              | 0.9667 | 0.7467   | 0.9996 | -33.143  | 0.9990 |
|                              | rs2581426   | 41712257 | 0.7333              | 0.9667 | 0.7467   | 0.9996 | -33.036  | 0.9990 |
|                              | rs2581424   | 41713389 | 0.7583              | 0.9667 | 0.6336   | 0.9969 | -33.004  | 0.9990 |
|                              | rs1848180   | 41713701 | 0.7333              | 0.9667 | 0.7467   | 0.9996 | -32.692  | 0.9989 |
|                              | rs10805092  | 41714239 | 0.7583              | 0.9667 | 0.6336   | 0.9968 | -32.724  | 0.9989 |
|                              | rs2581420   | 41716994 | 0.7583              | 0.9667 | 0.6336   | 0.9968 | -32.529  | 0.9989 |
|                              | rs10461065  | 41719050 | 0.7583              | 0.9667 | 0.6336   | 0.9969 | -32.398  | 0.9988 |
|                              | rs10461059  | 41720699 | 0.7583              | 0.9667 | 0.6336   | 0.9968 | -32.005  | 0.9987 |
|                              | rs9998823   | 41720912 | 0.7583              | 0.9722 | 0.6415   | 0.9973 | -31.955  | 0.9986 |
|                              | rs4241695   | 41722202 | 0.7583              | 0.9667 | 0.6336   | 0.9969 | -31.902  | 0.9986 |
|                              | rs9654067   | 41723554 | 0.7583              | 0.9667 | 0.6336   | 0.9968 | -31.794  | 0.9986 |
|                              | rs3827588   | 41725973 | 0.7583              | 0.9667 | 0.6336   | 0.9968 | -31.621  | 0.9985 |
|                              | rs3827590   | 41726194 | 0.7083              | 0.9722 | 0.6228   | 0.9961 | -32.823  | 0.9989 |
|                              | rs3827591   | 41726229 | 0.7083              | 0.9667 | 0.6149   | 0.9957 | -32.753  | 0.9989 |
|                              | rs4861155   | 41726781 | 0.7333              | 0.9667 | 0.7467   | 0.9996 | -30.908  | 0.9983 |
|                              | rs7683204   | 41728350 | 0.7583              | 0.9667 | 0.6336   | 0.9968 | -30.596  | 0.9982 |
|                              | rs11725865  | 41731391 | 0.7667              | 0.9667 | 0.6460   | 0.9975 | -24.214  | 0.9963 |

Table 12: Continuation of Table 11.

| Chromosome<br>Pop A vs Pop B                                                                                                                                   | SNP<br>Name | Position | Derived Allele Freq |        | $F_{st}$ |         | xp-EHHST |        |
|----------------------------------------------------------------------------------------------------------------------------------------------------------------|-------------|----------|---------------------|--------|----------|---------|----------|--------|
|                                                                                                                                                                |             |          | $p_A$               | $p_B$  | Value    | Pct     | Value    | Pct    |
| Chromosome 4 <sup>#</sup><br>CEU vs CHB+JPT<br><i>CCDC4</i><br>(41,808-41,850kb),<br><i>TMEM33</i><br>(41,632-41,653kb),<br><i>WDR21B</i><br>(41,679-41,680kb) | rs4377621   | 41738061 | 0.7083              | 0.9667 | 0.7375   | 0.9994  | -16.903  | 0.9903 |
|                                                                                                                                                                | rs10433708  | 41745215 | 0.7667              | 0.9667 | 0.6460   | 0.9976  | -17.061  | 0.9905 |
|                                                                                                                                                                | rs10938170  | 41750639 | 0.7667              | 0.9667 | 0.6460   | 0.9976  | -17.914  | 0.9915 |
|                                                                                                                                                                | rs3804192   | 41761196 | 0.7667              | 0.9667 | 0.6460   | 0.9976  | -20.819  | 0.9940 |
|                                                                                                                                                                | rs12647092  | 41766976 | 0.7083              | 0.9667 | 0.7375   | 0.9994  | -23.536  | 0.9959 |
|                                                                                                                                                                | rs10019356  | 41768229 | 0.7667              | 0.9667 | 0.6373   | 0.9972  | -24.122  | 0.9962 |
|                                                                                                                                                                | rs4438791   | 41769322 | 0.7083              | 0.9667 | 0.7375   | 0.9994  | -24.278  | 0.9963 |
|                                                                                                                                                                | rs7660223   | 41775871 | 0.7667              | 0.9667 | 0.6900   | 0.9988  | -24.694  | 0.9966 |
|                                                                                                                                                                | rs11725543  | 41781944 | 0.7667              | 0.9667 | 0.6460   | 0.9975  | -25.194  | 0.9968 |
|                                                                                                                                                                | rs10002107  | 41782303 | 0.7667              | 0.9667 | 0.6460   | 0.9975  | -25.519  | 0.9969 |
|                                                                                                                                                                | rs12511999  | 41786014 | 0.7083              | 0.9667 | 0.7375   | 0.9994  | -25.833  | 0.9970 |
|                                                                                                                                                                | rs6832890   | 41801295 | 0.7583              | 0.9667 | 0.7040   | 0.9991  | -28.418  | 0.9978 |
|                                                                                                                                                                | rs6447128   | 41801872 | 0.7500              | 0.9778 | 0.7156   | 0.9992  | -28.920  | 0.9979 |
|                                                                                                                                                                | rs7682049   | 41807491 | 0.6750              | 0.9500 | 0.7234   | 0.9993  | -29.900  | 0.9980 |
|                                                                                                                                                                | rs13756     | 41807998 | 0.6750              | 0.9500 | 0.7234   | 0.9993  | -30.249  | 0.9981 |
|                                                                                                                                                                | rs16854014  | 41812231 | 0.9333              | 0.9833 | 0.5479   | 0.9907  | -33.488  | 0.9991 |
|                                                                                                                                                                | rs2880666   | 41815266 | 0.6750              | 0.9500 | 0.7234   | 0.9993  | -30.402  | 0.9982 |
|                                                                                                                                                                | rs6447131   | 41824754 | 0.6750              | 0.9556 | 0.6949   | 0.9988  | -30.607  | 0.9983 |
|                                                                                                                                                                | rs6447132   | 41828823 | 0.6583              | 0.9556 | 0.6817   | 0.9986  | -30.965  | 0.9983 |
|                                                                                                                                                                | rs7664565   | 41829776 | 0.6667              | 0.9556 | 0.6838   | 0.9987  | -31.058  | 0.9984 |
| rs6848386                                                                                                                                                      | 41841414    | 0.6750   | 0.9556              | 0.5900 | 0.9941   | -35.879 | 0.9994   |        |
| rs6856819                                                                                                                                                      | 41844970    | 0.6917   | 0.9556              | 0.5430 | 0.9903   | -35.477 | 0.9994   |        |
| rs4861024                                                                                                                                                      | 41847307    | 0.6917   | 0.9556              | 0.5944 | 0.9944   | -35.493 | 0.9994   |        |
| rs4449446                                                                                                                                                      | 41849931    | 0.6833   | 0.9500              | 0.5758 | 0.9931   | -35.487 | 0.9994   |        |
| Chromosome 4 <sup>#</sup><br>CHB+JPT vs YRI<br><i>CCDC4</i><br>(41,808-41,850kb),<br><i>TMEM33</i><br>(41,632-41,653kb),<br><i>WDR21B</i><br>(41,679-41,680kb) | rs714226    | 41521093 | 0.9944              | 0.2417 | 0.6948   | 0.9988  | 43.888   | 0.9987 |
|                                                                                                                                                                | rs6840961   | 41522632 | 0.9833              | 0.2250 | 0.6237   | 0.9962  | 43.287   | 0.9986 |
|                                                                                                                                                                | rs9991121   | 41523790 | 0.9778              | 0.1250 | 0.7251   | 0.9993  | 41.429   | 0.9984 |
|                                                                                                                                                                | rs4623048   | 41528244 | 0.9611              | 0.0167 | 0.7677   | 0.9999  | 41.149   | 0.9983 |
|                                                                                                                                                                | rs9998239   | 41529367 | 0.9722              | 0.2083 | 0.6728   | 0.9983  | 40.640   | 0.9982 |
|                                                                                                                                                                | rs6839376   | 41544538 | 0.9611              | 0.1000 | 0.6990   | 0.9990  | 37.536   | 0.9979 |
|                                                                                                                                                                | rs6447118   | 41550330 | 0.9611              | 0.1000 | 0.6990   | 0.9990  | 36.870   | 0.9978 |
|                                                                                                                                                                | rs7356183   | 41554214 | 0.9611              | 0.1000 | 0.7035   | 0.9991  | 36.641   | 0.9977 |
|                                                                                                                                                                | rs7660832   | 41584424 | 0.9611              | 0.2417 | 0.5411   | 0.9900  | 32.202   | 0.9970 |
|                                                                                                                                                                | rs2660343   | 41672523 | 0.9778              | 0.0917 | 0.7001   | 0.9990  | 25.605   | 0.9954 |
|                                                                                                                                                                | rs2581459   | 41672864 | 0.9667              | 0.1083 | 0.6672   | 0.9982  | 24.505   | 0.9949 |
|                                                                                                                                                                | rs17445410  | 41674794 | 0.9778              | 0.0667 | 0.7264   | 0.9994  | 23.319   | 0.9942 |
|                                                                                                                                                                | rs2581460   | 41674877 | 0.9667              | 0.0333 | 0.7467   | 0.9996  | 23.189   | 0.9941 |
|                                                                                                                                                                | rs2581461   | 41676123 | 0.9667              | 0.0250 | 0.7556   | 0.9997  | 22.883   | 0.9939 |
|                                                                                                                                                                | rs937866    | 41676499 | 0.9778              | 0.0250 | 0.7702   | 0.9999  | 22.750   | 0.9937 |

Table 13: Continuation of Table 11 and Table 12.

| Chromosome<br>Pop A vs Pop B                                                                                                                       | SNP<br>Name | Position | Derived Allele Freq |        | $F_{st}$ |        | xp-EHHST |        |
|----------------------------------------------------------------------------------------------------------------------------------------------------|-------------|----------|---------------------|--------|----------|--------|----------|--------|
|                                                                                                                                                    |             |          | $p_A$               | $p_B$  | Value    | Pct    | Value    | Pct    |
| Chromosome 4#<br>CHB+JPT vs YRI<br><i>CCDC4</i><br>(41,808-41,850kb),<br><i>TMEM33</i><br>(41,632-41,653kb),<br><i>WDR21B</i><br>(41,679-41,680kb) | rs2660332   | 41679858 | 0.9667              | 0.0917 | 0.6951   | 0.9989 | 21.294   | 0.9923 |
|                                                                                                                                                    | rs2660335   | 41680446 | 0.9667              | 0.0917 | 0.6951   | 0.9989 | 76.343   | 1.0000 |
|                                                                                                                                                    | rs2581435   | 41685047 | 0.9667              | 0.0917 | 0.6951   | 0.9989 | 43.203   | 0.9985 |
|                                                                                                                                                    | rs4540084   | 41696545 | 0.9667              | 0.0917 | 0.6951   | 0.9989 | 44.736   | 0.9989 |
|                                                                                                                                                    | rs2660331   | 41696942 | 0.9667              | 0.0917 | 0.6951   | 0.9989 | 44.771   | 0.9989 |
|                                                                                                                                                    | rs2581455   | 41697890 | 0.9667              | 0.0583 | 0.7201   | 0.9993 | 46.368   | 0.9990 |
|                                                                                                                                                    | rs2660330   | 41698140 | 0.9667              | 0.0917 | 0.6989   | 0.9989 | 45.655   | 0.9990 |
|                                                                                                                                                    | rs1047626   | 41698428 | 0.9667              | 0.0583 | 0.7201   | 0.9993 | 46.739   | 0.9991 |
|                                                                                                                                                    | rs2581453   | 41698592 | 0.9722              | 0.0917 | 0.7027   | 0.9990 | 45.648   | 0.9990 |
|                                                                                                                                                    | rs2660329   | 41700744 | 0.9667              | 0.1500 | 0.6336   | 0.9969 | 43.825   | 0.9987 |
|                                                                                                                                                    | rs2660326   | 41701828 | 0.9667              | 0.1500 | 0.6336   | 0.9968 | 43.869   | 0.9987 |
|                                                                                                                                                    | rs2660325   | 41701960 | 0.9667              | 0.1500 | 0.6336   | 0.9969 | 43.877   | 0.9987 |
|                                                                                                                                                    | rs2581449   | 41701981 | 0.9667              | 0.1500 | 0.6336   | 0.9969 | 43.884   | 0.9987 |
|                                                                                                                                                    | rs2581448   | 41702151 | 0.9667              | 0.1500 | 0.6336   | 0.9969 | 43.894   | 0.9987 |
|                                                                                                                                                    | rs2660323   | 41702769 | 0.9667              | 0.1500 | 0.6336   | 0.9969 | 43.899   | 0.9988 |
|                                                                                                                                                    | rs9884564   | 41703000 | 0.9722              | 0.0333 | 0.7540   | 0.9997 | 47.257   | 0.9991 |
|                                                                                                                                                    | rs2581443   | 41703898 | 0.9667              | 0.1500 | 0.6336   | 0.9969 | 43.968   | 0.9988 |
|                                                                                                                                                    | rs2660319   | 41705641 | 0.9667              | 0.1000 | 0.6760   | 0.9985 | 45.204   | 0.9989 |
|                                                                                                                                                    | rs2581441   | 41706727 | 0.9667              | 0.0333 | 0.7467   | 0.9996 | 43.529   | 0.9986 |
|                                                                                                                                                    | rs2581426   | 41712257 | 0.9667              | 0.0333 | 0.7467   | 0.9996 | 43.555   | 0.9986 |
|                                                                                                                                                    | rs2581424   | 41713389 | 0.9667              | 0.1500 | 0.6336   | 0.9969 | 41.792   | 0.9984 |
|                                                                                                                                                    | rs1848180   | 41713701 | 0.9667              | 0.0333 | 0.7467   | 0.9996 | 44.255   | 0.9988 |
|                                                                                                                                                    | rs10805092  | 41714239 | 0.9667              | 0.1500 | 0.6336   | 0.9968 | 41.809   | 0.9984 |
|                                                                                                                                                    | rs2581420   | 41716994 | 0.9667              | 0.1500 | 0.6336   | 0.9968 | 58.621   | 0.9996 |
|                                                                                                                                                    | rs10461065  | 41719050 | 0.9667              | 0.1500 | 0.6336   | 0.9969 | 58.389   | 0.9995 |
|                                                                                                                                                    | rs10461059  | 41720699 | 0.9667              | 0.1500 | 0.6336   | 0.9968 | 61.837   | 0.9998 |
| rs9998823                                                                                                                                          | 41720912    | 0.9722   | 0.1500              | 0.6415 | 0.9973   | 61.750 | 0.9998   |        |
| rs4241695                                                                                                                                          | 41722202    | 0.9667   | 0.1500              | 0.6336 | 0.9969   | 61.646 | 0.9998   |        |

Table 14: Continuation of Table 11, Table 12, and Table 13.

| Chromosome<br>Pop A vs Pop B                                                                                                                                   | SNP<br>Name | Position | Derived Allele Freq |        | $F_{st}$ |        | xp-EHHST |        |
|----------------------------------------------------------------------------------------------------------------------------------------------------------------|-------------|----------|---------------------|--------|----------|--------|----------|--------|
|                                                                                                                                                                |             |          | $p_A$               | $p_B$  | Value    | Pct    | Value    | Pct    |
| Chromosome 4 <sup>#</sup><br>CHB+JPT vs YRI<br><i>CCDC4</i><br>(41,808-41,850kb),<br><i>TMEM33</i><br>(41,632-41,653kb),<br><i>WDR21B</i><br>(41,679-41,680kb) | rs9654067   | 41723554 | 0.9667              | 0.1500 | 0.6336   | 0.9968 | 61.402   | 0.9998 |
|                                                                                                                                                                | rs3827588   | 41725973 | 0.9667              | 0.1500 | 0.6336   | 0.9968 | 60.941   | 0.9997 |
|                                                                                                                                                                | rs3827590   | 41726194 | 0.9722              | 0.1500 | 0.6228   | 0.9961 | 60.765   | 0.9997 |
|                                                                                                                                                                | rs3827591   | 41726229 | 0.9667              | 0.1500 | 0.6149   | 0.9957 | 60.572   | 0.9997 |
|                                                                                                                                                                | rs4861155   | 41726781 | 0.9667              | 0.0333 | 0.7467   | 0.9996 | 61.698   | 0.9998 |
|                                                                                                                                                                | rs7683204   | 41728350 | 0.9667              | 0.1500 | 0.6336   | 0.9968 | 59.844   | 0.9996 |
|                                                                                                                                                                | rs11725865  | 41731391 | 0.9667              | 0.1417 | 0.6460   | 0.9975 | 64.889   | 0.9999 |
|                                                                                                                                                                | rs10006383  | 41733603 | 0.9667              | 0.1417 | 0.6460   | 0.9976 | 24.969   | 0.9951 |
|                                                                                                                                                                | rs12507609  | 41736854 | 0.9667              | 0.1500 | 0.6373   | 0.9972 | 25.243   | 0.9953 |
|                                                                                                                                                                | rs4377621   | 41738061 | 0.9667              | 0.0333 | 0.7375   | 0.9994 | 26.478   | 0.9959 |
|                                                                                                                                                                | rs10433708  | 41745215 | 0.9667              | 0.1417 | 0.6460   | 0.9976 | 26.422   | 0.9959 |
|                                                                                                                                                                | rs10938170  | 41750639 | 0.9667              | 0.1417 | 0.6460   | 0.9976 | 28.098   | 0.9962 |
|                                                                                                                                                                | rs3804192   | 41761196 | 0.9667              | 0.1417 | 0.6460   | 0.9976 | 29.419   | 0.9965 |
|                                                                                                                                                                | rs12647092  | 41766976 | 0.9667              | 0.0333 | 0.7375   | 0.9994 | 34.658   | 0.9973 |
|                                                                                                                                                                | rs10019356  | 41768229 | 0.9667              | 0.1500 | 0.6373   | 0.9972 | 34.329   | 0.9973 |
|                                                                                                                                                                | rs4438791   | 41769322 | 0.9667              | 0.0333 | 0.7375   | 0.9994 | 35.882   | 0.9976 |
|                                                                                                                                                                | rs7660223   | 41775871 | 0.9667              | 0.1000 | 0.6900   | 0.9988 | 37.575   | 0.9979 |
|                                                                                                                                                                | rs11725543  | 41781944 | 0.9667              | 0.1417 | 0.6460   | 0.9975 | 38.116   | 0.9979 |
|                                                                                                                                                                | rs10002107  | 41782303 | 0.9667              | 0.1417 | 0.6460   | 0.9975 | 38.612   | 0.9980 |
|                                                                                                                                                                | rs12511999  | 41786014 | 0.9667              | 0.0333 | 0.7375   | 0.9994 | 40.573   | 0.9982 |
|                                                                                                                                                                | rs6832890   | 41801295 | 0.9667              | 0.0833 | 0.7040   | 0.9991 | 43.069   | 0.9985 |
|                                                                                                                                                                | rs6447128   | 41801872 | 0.9778              | 0.0833 | 0.7156   | 0.9992 | 44.338   | 0.9988 |
|                                                                                                                                                                | rs7682049   | 41807491 | 0.9500              | 0.0167 | 0.7234   | 0.9993 | 55.109   | 0.9994 |
|                                                                                                                                                                | rs13756     | 41807998 | 0.9500              | 0.0167 | 0.7234   | 0.9993 | 55.762   | 0.9994 |
|                                                                                                                                                                | rs16854014  | 41812231 | 0.9833              | 0.3667 | 0.5479   | 0.9907 | 57.906   | 0.9995 |
|                                                                                                                                                                | rs2880666   | 41815266 | 0.9500              | 0.0167 | 0.7234   | 0.9993 | 57.999   | 0.9995 |
|                                                                                                                                                                | rs6447131   | 41824754 | 0.9556              | 0.0500 | 0.6949   | 0.9988 | 65.236   | 0.9999 |
|                                                                                                                                                                | rs6447132   | 41828823 | 0.9556              | 0.0583 | 0.6817   | 0.9986 | 65.391   | 0.9999 |
|                                                                                                                                                                | rs7664565   | 41829776 | 0.9556              | 0.0583 | 0.6838   | 0.9987 | 65.394   | 0.9999 |
|                                                                                                                                                                | rs6848386   | 41841414 | 0.9556              | 0.1500 | 0.5900   | 0.9941 | 69.135   | 0.9999 |
|                                                                                                                                                                | rs6856819   | 41844970 | 0.9556              | 0.2000 | 0.5430   | 0.9903 | 68.176   | 0.9999 |
|                                                                                                                                                                | rs4861024   | 41847307 | 0.9556              | 0.1500 | 0.5944   | 0.9944 | 68.152   | 0.9999 |
|                                                                                                                                                                | rs4449446   | 41849931 | 0.9500              | 0.1583 | 0.5758   | 0.9931 | 66.012   | 0.9999 |

Table 15: Regions and SNPs which had highest xp-EHHST values, strongest differentiations, and high derived allele frequency in the tested population CHB+JPT ( $> 0.5$ ) on chromosome 5 of the HapMap phase II data. \* marked regions which were not reported in Table 1, Sabeti et al. (2007).

| Chromosome<br>Pop A vs Pop B    | SNP<br>Name | Position  | Derived Allele Freq |        | $F_{st}$ |        | xp-EHHST |        |
|---------------------------------|-------------|-----------|---------------------|--------|----------|--------|----------|--------|
|                                 |             |           | $p_A$               | $p_B$  | Value    | Pct    | Value    | Pct    |
| Chromosome 5*<br>CEU vs CHB+JPT | rs10037966  | 117382088 | 0.4333              | 0.9778 | 0.7548   | 0.9997 | -23.541  | 0.9945 |
|                                 | rs10037996  | 117382265 | 0.4333              | 0.9778 | 0.6604   | 0.9983 | -23.463  | 0.9944 |
|                                 | rs6595087   | 117403444 | 0.5167              | 0.9778 | 0.6570   | 0.9982 | -23.301  | 0.9943 |
|                                 | rs10060421  | 117420110 | 0.4500              | 0.9778 | 0.7524   | 0.9996 | -22.386  | 0.9938 |
|                                 | rs10075628  | 117420311 | 0.4417              | 0.9778 | 0.7536   | 0.9997 | -22.296  | 0.9938 |
|                                 | rs2900114   | 117421055 | 0.4417              | 0.9778 | 0.6436   | 0.9978 | -22.187  | 0.9936 |
|                                 | rs2416504   | 117436991 | 0.4000              | 0.9778 | 0.7610   | 0.9998 | -20.492  | 0.9918 |
|                                 | rs11241446  | 117438830 | 0.4000              | 0.9778 | 0.7610   | 0.9998 | -20.392  | 0.9917 |
|                                 | rs4489097   | 117467677 | 0.4333              | 0.9778 | 0.7548   | 0.9997 | -20.099  | 0.9913 |
|                                 | rs4479878   | 117472746 | 0.4333              | 0.9778 | 0.7548   | 0.9997 | -19.805  | 0.9909 |
|                                 | rs13171314  | 117475111 | 0.4333              | 0.9778 | 0.7386   | 0.9994 | -19.739  | 0.9908 |
|                                 | rs4523039   | 117476132 | 0.4417              | 0.9778 | 0.7292   | 0.9993 | -19.663  | 0.9907 |
|                                 | rs7724328   | 117515965 | 0.4083              | 0.9778 | 0.6812   | 0.9988 | -28.043  | 0.9958 |
|                                 | rs4317366   | 117516317 | 0.4083              | 0.9778 | 0.7513   | 0.9996 | -28.028  | 0.9957 |
|                                 | rs6872244   | 117517311 | 0.4083              | 0.9667 | 0.7364   | 0.9993 | -27.270  | 0.9955 |
|                                 | rs1479207   | 117520698 | 0.4083              | 0.9778 | 0.7513   | 0.9996 | -25.204  | 0.9949 |
|                                 | rs10079352  | 117522539 | 0.4083              | 0.9778 | 0.7513   | 0.9996 | -25.350  | 0.9949 |
|                                 | rs4639272   | 117524321 | 0.4167              | 0.9778 | 0.6568   | 0.9982 | -25.560  | 0.9950 |
|                                 | rs4401605   | 117524359 | 0.4167              | 0.9778 | 0.7496   | 0.9996 | -25.601  | 0.9950 |
|                                 | rs7721999   | 117524545 | 0.4250              | 0.9778 | 0.7481   | 0.9996 | -25.625  | 0.9950 |
|                                 | rs2900117   | 117525764 | 0.5000              | 0.9778 | 0.7231   | 0.9992 | -26.258  | 0.9952 |
|                                 | rs734155    | 117531602 | 0.4917              | 0.9778 | 0.6125   | 0.9967 | -27.657  | 0.9956 |
|                                 | rs13356156  | 117533769 | 0.4583              | 0.9778 | 0.7027   | 0.9990 | -27.744  | 0.9956 |
|                                 | rs1479196   | 117534564 | 0.4583              | 0.9778 | 0.7027   | 0.9990 | -27.779  | 0.9956 |
|                                 | rs1382721   | 117543368 | 0.5000              | 0.9778 | 0.7066   | 0.9990 | -28.347  | 0.9959 |
|                                 | rs1382720   | 117547386 | 0.4583              | 0.9778 | 0.7107   | 0.9991 | -28.120  | 0.9958 |
|                                 | rs6883098   | 117588162 | 0.5000              | 0.9778 | 0.5522   | 0.9925 | -52.723  | 0.9998 |
|                                 | rs1479225   | 117588467 | 0.5000              | 0.9778 | 0.5594   | 0.9935 | -52.738  | 0.9998 |
|                                 | rs6859099   | 117590938 | 0.4750              | 0.9722 | 0.5486   | 0.9922 | -52.507  | 0.9997 |
|                                 | rs1871367   | 117599244 | 0.4167              | 0.9667 | 0.7347   | 0.9993 | -43.487  | 0.9991 |
|                                 | rs7341174   | 117620240 | 0.5833              | 0.9667 | 0.5287   | 0.9900 | -44.041  | 0.9991 |
|                                 | rs11739660  | 117649726 | 0.7333              | 0.9778 | 0.6050   | 0.9964 | -20.987  | 0.9926 |
|                                 | rs1600306   | 117651679 | 0.6167              | 0.9778 | 0.6865   | 0.9989 | -20.824  | 0.9923 |
|                                 | rs11949106  | 117684094 | 0.7083              | 0.9611 | 0.5726   | 0.9945 | -28.020  | 0.9957 |
|                                 | rs7446144   | 117689860 | 0.5500              | 0.8667 | 0.6095   | 0.9966 | -25.274  | 0.9949 |
|                                 | rs12517872  | 117720242 | 0.3667              | 0.8556 | 0.6135   | 0.9968 | -29.512  | 0.9963 |
|                                 | rs7704260   | 117738963 | 0.5167              | 0.9944 | 0.6192   | 0.9971 | -31.263  | 0.9966 |
|                                 | rs6595121   | 117743531 | 0.7667              | 0.9667 | 0.5849   | 0.9953 | -34.741  | 0.9972 |
|                                 | rs6595126   | 117777372 | 0.4333              | 0.8556 | 0.5735   | 0.9946 | -34.936  | 0.9972 |
|                                 | rs6867291   | 117796132 | 0.4417              | 0.8556 | 0.5635   | 0.9940 | -32.671  | 0.9968 |



Table 16: Continuation of Table 15.

| Chromosome<br>Pop A vs Pop B    | SNP<br>Name | Position  | Derived Allele Freq |        | $F_{st}$ |        | xp-EHHST |        |
|---------------------------------|-------------|-----------|---------------------|--------|----------|--------|----------|--------|
|                                 |             |           | $p_A$               | $p_B$  | Value    | Pct    | Value    | Pct    |
| Chromosome 5*<br>CHB+JPT vs YRI | rs397317    | 117006587 | 0.9722              | 0.0250 | 0.7391   | 0.9996 | 24.665   | 0.9922 |
|                                 | rs267035    | 117010380 | 0.9722              | 0.0250 | 0.7391   | 0.9996 | 25.942   | 0.9929 |
|                                 | rs267033    | 117010655 | 0.9722              | 0.0250 | 0.7391   | 0.9996 | 24.397   | 0.9920 |
|                                 | rs267030    | 117011477 | 0.9722              | 0.0250 | 0.7391   | 0.9996 | 24.775   | 0.9923 |
|                                 | rs192378    | 117011538 | 0.9722              | 0.0250 | 0.7391   | 0.9996 | 24.910   | 0.9924 |
|                                 | rs197864    | 117014844 | 0.9722              | 0.0250 | 0.7391   | 0.9996 | 25.077   | 0.9924 |
|                                 | rs842002    | 117023413 | 0.9722              | 0.0250 | 0.7391   | 0.9996 | 23.153   | 0.9909 |
|                                 | rs842003    | 117023684 | 0.9722              | 0.0250 | 0.7391   | 0.9996 | 23.185   | 0.9909 |
|                                 | rs2416472   | 117033845 | 0.9667              | 0.0417 | 0.7233   | 0.9992 | 29.781   | 0.9948 |
|                                 | rs7714451   | 117037818 | 0.9667              | 0.1750 | 0.6463   | 0.9979 | 34.420   | 0.9969 |
|                                 | rs10037966  | 117382088 | 0.9778              | 0.0083 | 0.7548   | 0.9997 | 23.702   | 0.9916 |
|                                 | rs10037996  | 117382265 | 0.9778              | 0.1083 | 0.6604   | 0.9983 | 23.526   | 0.9914 |
|                                 | rs6595087   | 117403444 | 0.9778              | 0.1000 | 0.6570   | 0.9982 | 23.400   | 0.9912 |
|                                 | rs2416504   | 117436991 | 0.9778              | 0.0083 | 0.7610   | 0.9998 | 24.142   | 0.9919 |
|                                 | rs11241446  | 117438830 | 0.9778              | 0.0083 | 0.7610   | 0.9998 | 24.016   | 0.9918 |
|                                 | rs4489097   | 117467677 | 0.9778              | 0.0083 | 0.7548   | 0.9997 | 33.922   | 0.9967 |
|                                 | rs4479878   | 117472746 | 0.9778              | 0.0083 | 0.7548   | 0.9997 | 32.976   | 0.9963 |
|                                 | rs13171314  | 117475111 | 0.9778              | 0.0250 | 0.7386   | 0.9994 | 32.321   | 0.9959 |
|                                 | rs4523039   | 117476132 | 0.9778              | 0.0333 | 0.7292   | 0.9993 | 31.432   | 0.9954 |
|                                 | rs10042930  | 117478730 | 0.9778              | 0.1167 | 0.6495   | 0.9980 | 31.133   | 0.9952 |
|                                 | rs10037904  | 117478925 | 0.9778              | 0.0500 | 0.7107   | 0.9991 | 30.840   | 0.9952 |
|                                 | rs7724328   | 117515965 | 0.9778              | 0.0917 | 0.6812   | 0.9988 | 59.327   | 0.9998 |
|                                 | rs4317366   | 117516317 | 0.9778              | 0.0167 | 0.7513   | 0.9996 | 59.649   | 0.9998 |
|                                 | rs6872244   | 117517311 | 0.9667              | 0.0167 | 0.7364   | 0.9993 | 57.891   | 0.9998 |
|                                 | rs1479207   | 117520698 | 0.9778              | 0.0167 | 0.7513   | 0.9996 | 41.750   | 0.9986 |
|                                 | rs10079352  | 117522539 | 0.9778              | 0.0167 | 0.7513   | 0.9996 | 42.270   | 0.9987 |
|                                 | rs4639272   | 117524321 | 0.9778              | 0.1167 | 0.6568   | 0.9982 | 41.946   | 0.9986 |
|                                 | rs4401605   | 117524359 | 0.9778              | 0.0167 | 0.7496   | 0.9996 | 42.470   | 0.9987 |
|                                 | rs7721999   | 117524545 | 0.9778              | 0.0167 | 0.7481   | 0.9996 | 42.632   | 0.9988 |
|                                 | rs2900117   | 117525764 | 0.9778              | 0.0333 | 0.7231   | 0.9992 | 42.214   | 0.9987 |
|                                 | rs734155    | 117531602 | 0.9778              | 0.1500 | 0.6125   | 0.9967 | 45.877   | 0.9990 |
|                                 | rs13356156  | 117533769 | 0.9778              | 0.0583 | 0.7027   | 0.9990 | 40.494   | 0.9983 |
|                                 | rs1479196   | 117534564 | 0.9778              | 0.0583 | 0.7027   | 0.9990 | 40.258   | 0.9982 |
|                                 | rs1382721   | 117543368 | 0.9778              | 0.0500 | 0.7066   | 0.9990 | 41.721   | 0.9986 |
|                                 | rs1382720   | 117547386 | 0.9778              | 0.0500 | 0.7107   | 0.9991 | 40.779   | 0.9983 |
|                                 | rs6883098   | 117588162 | 0.9778              | 0.2167 | 0.5522   | 0.9925 | 47.296   | 0.9990 |
|                                 | rs1479225   | 117588467 | 0.9778              | 0.2083 | 0.5594   | 0.9935 | 47.365   | 0.9990 |
|                                 | rs6859099   | 117590938 | 0.9722              | 0.2167 | 0.5486   | 0.9922 | 45.930   | 0.9990 |
|                                 | rs1871367   | 117599244 | 0.9667              | 0.0167 | 0.7347   | 0.9993 | 52.081   | 0.9994 |
|                                 | rs7341174   | 117620240 | 0.9667              | 0.2167 | 0.5287   | 0.9900 | 50.863   | 0.9992 |
| rs11949106                      | 117684094   | 0.9611    | 0.1833              | 0.5726 | 0.9945   | 31.176 | 0.9953   |        |
| rs7446144                       | 117689860   | 0.8667    | 0.0083              | 0.6095 | 0.9966   | 27.264 | 0.9937   |        |
| rs12517872                      | 117720242   | 0.8556    | 0.0083              | 0.6135 | 0.9968   | 39.572 | 0.9980   |        |
| rs7704260                       | 117738963   | 0.9944    | 0.1667              | 0.6192 | 0.9971   | 41.948 | 0.9986   |        |
| rs6595121                       | 117743531   | 0.9667    | 0.2000              | 0.5849 | 0.9953   | 41.030 | 0.9984   |        |
| rs6595126                       | 117777372   | 0.8556    | 0.0333              | 0.5735 | 0.9946   | 34.886 | 0.9970   |        |
| rs6867291                       | 117796132   | 0.8556    | 0.0417              | 0.5635 | 0.9940   | 34.951 | 0.9970   |        |

Table 17: Regions and SNPs which had highest xp-EHHST values, strongest differentiations, and high derived allele frequency in the tested population CEU ( $> 0.5$ ) on chromosome 7 of the HapMap phase II data. \* marked regions which were not reported in Table 1, Sabeti et al. (2007).

| Chromosome<br>Pop A vs Pop B    | SNP<br>Name | Position  | Derived Allele Freq |        | $F_{st}$ |        | xp-EHHST |        |
|---------------------------------|-------------|-----------|---------------------|--------|----------|--------|----------|--------|
|                                 |             |           | $p_A$               | $p_B$  | Value    | Pct    | Value    | Pct    |
| Chromosome 7*<br>CEU vs CHB+JPT | rs7789561   | 119168428 | 0.7667              | 0.9611 | 0.6736   | 0.9987 | 17.842   | 0.9945 |
|                                 | rs11978043  | 119170356 | 0.7667              | 0.9611 | 0.6736   | 0.9987 | 17.849   | 0.9945 |
|                                 | rs1404083   | 119187663 | 0.7667              | 0.9611 | 0.6736   | 0.9987 | 17.807   | 0.9944 |
|                                 | rs12706259  | 119197681 | 0.7667              | 0.9556 | 0.6661   | 0.9984 | 17.383   | 0.9939 |
|                                 | rs13239182  | 119212898 | 0.7667              | 0.9611 | 0.7180   | 0.9995 | 17.669   | 0.9942 |
|                                 | rs12536246  | 119216218 | 0.7667              | 0.9611 | 0.7180   | 0.9995 | 17.477   | 0.9940 |
|                                 | rs6466713   | 119221432 | 0.7667              | 0.9611 | 0.6736   | 0.9987 | 17.277   | 0.9937 |
|                                 | rs940412    | 119228681 | 0.7667              | 0.9611 | 0.6736   | 0.9987 | 20.297   | 0.9967 |
|                                 | rs1916859   | 119230892 | 0.7667              | 0.9611 | 0.6736   | 0.9987 | 20.246   | 0.9966 |
|                                 | rs10258725  | 119251546 | 0.7667              | 0.9611 | 0.6736   | 0.9987 | 14.502   | 0.9900 |
|                                 | rs1524197   | 119261545 | 0.7667              | 0.9611 | 0.6736   | 0.9986 | 14.886   | 0.9905 |
|                                 | rs1949781   | 119263552 | 0.7667              | 0.9611 | 0.6736   | 0.9986 | 14.928   | 0.9905 |
|                                 | rs1357670   | 119264341 | 0.7667              | 0.9611 | 0.6736   | 0.9987 | 15.039   | 0.9907 |
|                                 | rs6949406   | 119319595 | 0.7667              | 0.9611 | 0.6559   | 0.9980 | 15.712   | 0.9917 |
| Chromosome 7*<br>CEU vs YRI     | rs7789561   | 119168428 | 0.7667              | 0.1083 | 0.6736   | 0.9987 | 17.596   | 0.9955 |
|                                 | rs11978043  | 119170356 | 0.7667              | 0.1083 | 0.6736   | 0.9987 | 17.526   | 0.9955 |
|                                 | rs1404083   | 119187663 | 0.7667              | 0.1083 | 0.6736   | 0.9987 | 42.536   | 0.9999 |
|                                 | rs12706259  | 119197681 | 0.7667              | 0.1083 | 0.6661   | 0.9984 | 42.008   | 0.9999 |
|                                 | rs13239182  | 119212898 | 0.7667              | 0.0667 | 0.7180   | 0.9995 | 39.496   | 0.9998 |
|                                 | rs12536246  | 119216218 | 0.7667              | 0.0667 | 0.7180   | 0.9995 | 37.244   | 0.9997 |
|                                 | rs6466713   | 119221432 | 0.7667              | 0.1083 | 0.6736   | 0.9987 | 16.391   | 0.9941 |
|                                 | rs940412    | 119228681 | 0.7667              | 0.1083 | 0.6736   | 0.9987 | 18.403   | 0.9967 |
|                                 | rs1916859   | 119230892 | 0.7667              | 0.1083 | 0.6736   | 0.9987 | 18.516   | 0.9969 |
|                                 | rs1524197   | 119261545 | 0.7667              | 0.1083 | 0.6736   | 0.9986 | 15.207   | 0.9922 |
|                                 | rs1949781   | 119263552 | 0.7667              | 0.1083 | 0.6736   | 0.9986 | 15.385   | 0.9925 |
|                                 | rs1357670   | 119264341 | 0.7667              | 0.1083 | 0.6736   | 0.9987 | 15.637   | 0.9930 |
|                                 | rs6949406   | 119319595 | 0.7667              | 0.1250 | 0.6559   | 0.9980 | 17.911   | 0.9960 |
|                                 | rs4644180   | 119334545 | 0.7667              | 0.1083 | 0.6736   | 0.9986 | 19.101   | 0.9974 |
|                                 | rs10266385  | 119345144 | 0.7667              | 0.1167 | 0.6648   | 0.9983 | 16.632   | 0.9943 |
| rs10254361                      | 119351441   | 0.7667    | 0.1167              | 0.6648 | 0.9983   | 15.903 | 0.9935   |        |
